# Supplementary material for: Catalyst-free visible-light-initiated oxidative coupling of aryldiazo sulfones with thiols leading to unsymmetrical sulfoxides in air
Source: Royal Society of Chemistry journal article supplement (doi:10.1039/c9gc00222g), 2019-01-01

## Supplementary Information

### **Catalyst-free visible-light-initiated oxidative coupling of aryldiazo sulfones with thiols leading to unsymmetrical sulfoxides in air**

Qishun Liu,<sup>a,†</sup> Leilei Wang,<sup>a,†</sup> Huilan Yue,<sup>b</sup> Jiang-Sheng Li,<sup>c</sup> Zidan Luo<sup>d</sup> and Wei Wei<sup>\*a,b</sup>

<sup>a</sup>*School of Chemistry and Chemical Engineering, Qufu Normal University, Qufu 273165, Shandong, China*

<sup>b</sup>*Qinghai Provincial Key Laboratory of Tibetan Medicine Research and Key Laboratory of Tibetan Medicine Research, Northwest Institute of Plateau Biology, Chinese Academy of Sciences, Qinghai 810008, China*

<sup>c</sup>*School of Chemistry and food Engineering, Changsha University of Science and Technology, Changsha, 410114, P. R. China*

<sup>d</sup>*School of Chemistry and Chemical Engineering, Hunan University of Science and Technology, Xiangtan 411201, P. R. China*

<sup>†</sup>*These authors contributed equally to this work.*

<sup>\*</sup>*E-mail: weiweiqfnu@163.com*

## Contents

|                                                                                                             |         |
|-------------------------------------------------------------------------------------------------------------|---------|
| 1. General information .....                                                                                | S2      |
| 2. General procedure for the synthesis of sulfoxides from aryldiazo sulfones and various thiols in air..... | S2      |
| 3. Preliminary mechanistic studies .....                                                                    | S2-S6   |
| 4. Characterization data of products <b>3aa–3ia</b> .....                                                   | S6-S14  |
| 5. References .....                                                                                         | S14     |
| 6. Copies of NMR spectra for <b>3aa–3ia</b> .....                                                           | S15-S41 |

## 1. General information

All commercially available reagent grade chemicals were purchased from Aldrich, Acros, Alfa Aesar and Energy Chemical Company and used as received without further purification unless otherwise stated. All solvents were dried according to standard procedures.  $^1\text{H}$  NMR and  $^{13}\text{C}$  NMR were recorded in  $\text{CDCl}_3$  on a Bruker Avance III 400 spectrometer with TMS as internal standard (500 MHz  $^1\text{H}$ , 125 MHz  $^{13}\text{C}$ ) at room temperature, the chemical shifts ( $\delta$ ) were expressed in ppm and  $J$  values were given in Hz. The following abbreviations are used to indicate the multiplicity: singlet (s), doublet (d), triplet (t), quartet (q), doublet of doublets (dd), doublet of triplets (dt), and multiplet (m). All first order splitting patterns were assigned on the basis of the appearance of the multiplet. Splitting patterns that could not be easily interpreted were designated as multiplet (m). Mass analyses and HRMS were obtained on a Finnigan-LCQDECA mass spectrometer and a Bruker Daltonics Bio-TOF-Q mass spectrometer by the ESI method, respectively. Column chromatography was performed on silica gel (200-300 mesh). There is 3.0 cm distance between the reactor and LEDs.

## 2. General procedure for the synthesis of sulfoxides from aryldiazo sulfones and various thiols in air.

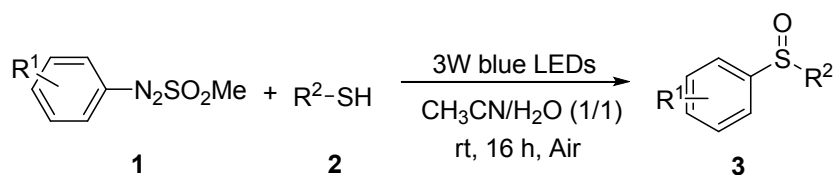

To a solution of aryldiazo sulfones **1** (0.3 mmol) in  $\text{CH}_3\text{CN}/\text{H}_2\text{O}$  ( $v_1/v_2=1/1$ , 2 mL) was added thiol **2** (0.1 mmol). The reaction mixture was open to the air and stirred under the irradiation of 3W blue LEDs at room temperature for 16h. After completion of the reaction, the solution was concentrated in vacuum. The residue was purified by flash column chromatography using a mixture of petroleum ether and ethyl acetate as eluent to give the desired product **3**.

## 3. Preliminary mechanistic studies

### 3.1 The addition of TEMPO in the model reaction system.

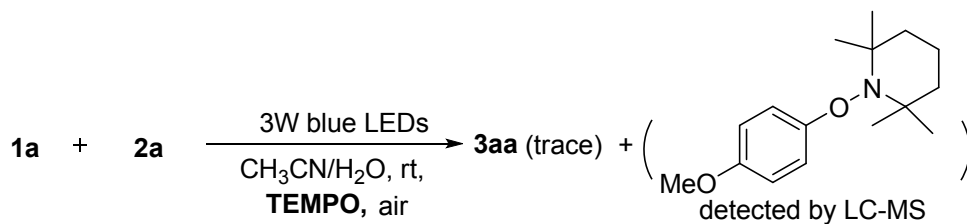

To a solution of 1-(4-methoxyphenyl)-2-(methylsulfonyl)diazene **1a** (0.3 mmol) and TEMPO (0.3 mmol) in CH<sub>3</sub>CN/H<sub>2</sub>O (v<sub>1</sub>/v<sub>2</sub>=1/1, 2 mL) was added benzenethiol **2a**. The reaction mixture was open to the air and stirred under the irradiation of 3W blue LEDs at room temperature. After completion of the reaction, the solution was concentrated in vacuum, aryl-TEMPO adduct was detected LC-MS.

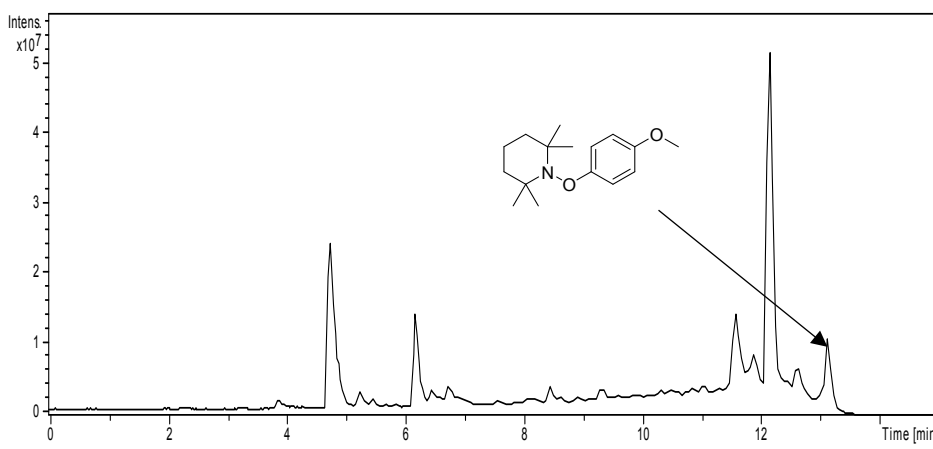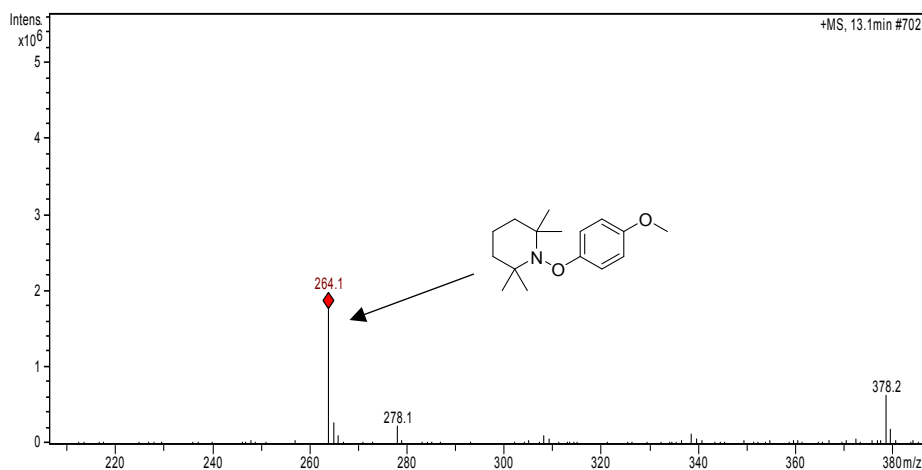

**3.2 The model reaction was carried out under N<sub>2</sub>.**

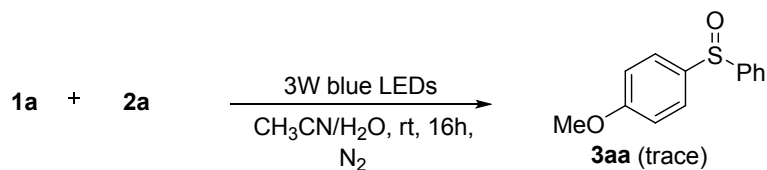

To the mixture of 1-(4-methoxyphenyl)-2-(methylsulfonyl)diazene **1a** (0.3 mmol) and benzenethiol **2a** (0.1 mmol) was added the solvent of CH<sub>3</sub>CN/H<sub>2</sub>O (v<sub>1</sub>/v<sub>2</sub>=1/1, 2 mL) under N<sub>2</sub>. The reaction mixture was stirred under the irradiation of 3W blue LEDs at room temperature. After completion of the reaction, the solution was concentrated in vacuum, only a trace amount of desired product was detected.

### 3.3 The model reaction was carried out under H<sub>2</sub>O<sup>18</sup> (<sup>18</sup>O-labeling experiment).

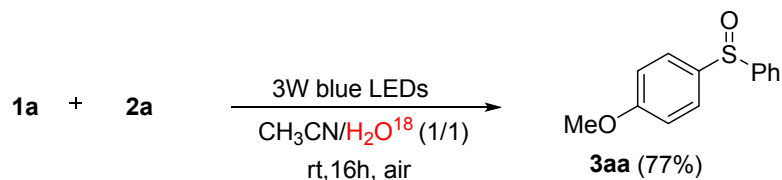

To a solution of 1-(4-methoxyphenyl)-2-(methylsulfonyl)diazene **1a** (0.3 mmol) in CH<sub>3</sub>CN/H<sub>2</sub>O<sup>18</sup> (v<sub>1</sub>/v<sub>2</sub>=1/1, 2 mL) was added benzenethiol **2a** (0.1 mmol). The reaction mixture was open to the air and stirred under the irradiation of 3W blue LEDs at room temperature. After completion of the reaction, the solution was concentrated in vacuum. The residue was purified by flash column chromatography using a mixture of petroleum ether and ethyl acetate as eluent to give the desired product **3aa** in 77% yield. The LC-MS spectrum of **3aa** is demonstrated as bellow

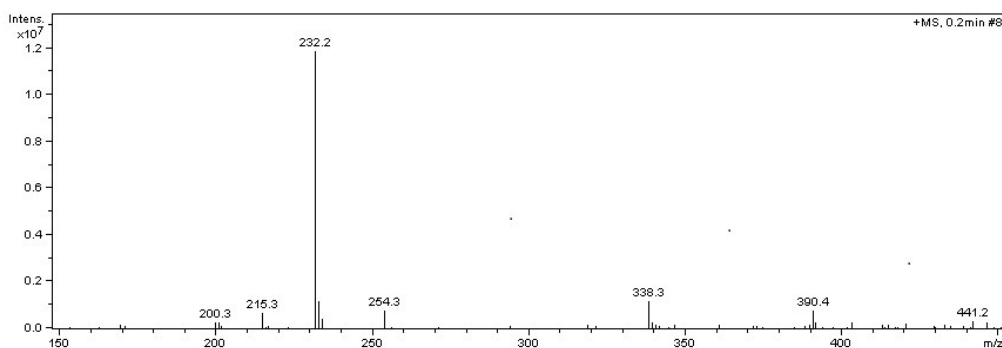

MS spectra of **3aa**

### 3.4 The addition of DABCO in the model reaction system.

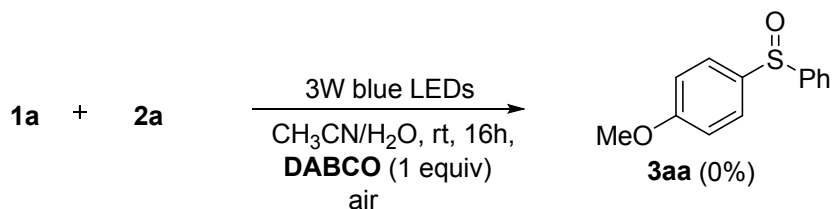

To a solution of 1-(4-methoxyphenyl)-2-(methylsulfonyl)diazene **1a** (0.3 mmol), and DABCO (0.2 mmol) in CH<sub>3</sub>CN/H<sub>2</sub>O (v<sub>1</sub>/v<sub>2</sub>=1/1) 2 mL was added benzenethiol **2a** (0.1 mmol). The reaction mixture was open to the air and stirred under the irradiation of 3W blue LEDs at room temperature. After completion of the reaction, the solution was concentrated in vacuum, there is no desired product **3aa** was detected, which indicated that this transformation should involve <sup>1</sup>O<sub>2</sub>-mediated process.

### 3.5 The reaction of **1a** with **4a**.

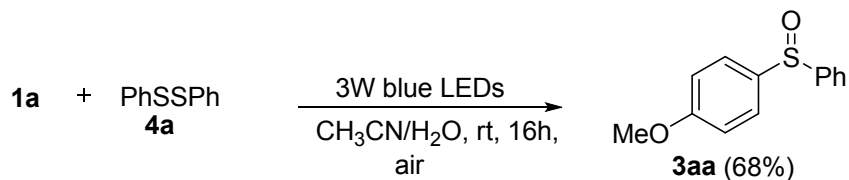

CH<sub>3</sub>CN/H<sub>2</sub>O (v<sub>1</sub>/v<sub>2</sub>=1/1) 2 mL was added to the mixture of 1,2-diphenyldisulfane **4a** and 1-(4-methoxyphenyl)-2-(methylsulfonyl)diazene **1a**. The reaction mixture was open to the air and stirred under the irradiation of 3W blue LEDs at room temperature. After completion of the reaction, the solution was concentrated in vacuum. The residue was purified by flash column chromatography using a mixture of petroleum ether and ethyl acetate as eluent to give the product **3aa** in 68% yield.

### 3.6 The model reaction was carried out for 20 min.

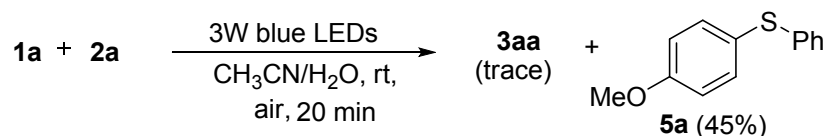

To a solution of 1-(4-methoxyphenyl)-2-(methylsulfonyl)diazene **1a** (0.3 mmol) in CH<sub>3</sub>CN/H<sub>2</sub>O (v<sub>1</sub>/v<sub>2</sub>=1/1, 2 mL) was added benzenethiol **2a** (0.1 mmol). The reaction mixture was open to the air and stirred under the irradiation of 3W blue LEDs at room

temperature for 20 min. The solution was concentrated in vacuum. The residue was purified by flash column chromatography using a mixture of petroleum ether and ethyl acetate as eluent to give the **5a** in 45%.

### 3.7 The transformation of **5a** under the standard conditions.

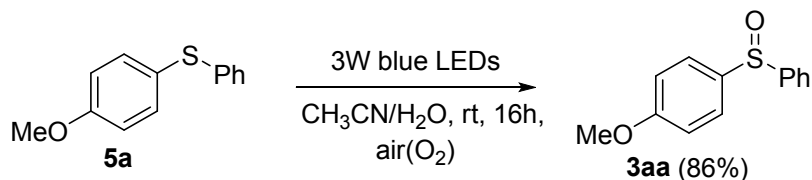

To a solution of CH<sub>3</sub>CN/H<sub>2</sub>O (v<sub>1</sub>/v<sub>2</sub>=1/1, 2 mL) was added sulfide **5a** (0.1 mmol). The reaction mixture was open to the air and stirred under the irradiation of 3 W blue LEDs at room temperature for 16h. After completion of the reaction, the solution was concentrated in vacuum. The residue was purified by flash column chromatography using a mixture of petroleum ether and ethyl acetate as eluent to give the product **3aa** in 86% yield.

## 4. Characterization data of products **3aa-3ia**

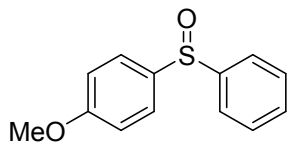

**1-Methoxy-4-(phenylsulfinyl)benzene**<sup>[1]</sup>, Compound **3aa** was obtained in 79% yield according to the general procedure. <sup>1</sup>H NMR (CDCl<sub>3</sub>, 500 MHz, ppm): δ 7.62-7.60 (m, 2H), 7.58-7.56 (m, 2H), 7.47-7.43 (m, 3H), 6.96 (d, *J* = 8.9 Hz, 2H), 3.82 (s, 3H); <sup>13</sup>C NMR (CDCl<sub>3</sub>, 125 MHz, ppm): δ 162.1, 145.7, 136.6, 130.8, 129.2, 127.3, 124.6, 114.9, 55.5; MS (EI); [M+H]<sup>+</sup>: 233.2.

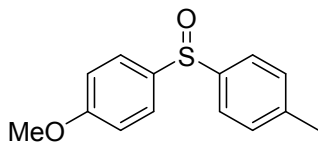

**1-Methoxy-4-(p-tolylsulfinyl)benzene**<sup>[1]</sup>, Compound **3ab** was obtained in 82% yield according to the general procedure. <sup>1</sup>H NMR (CDCl<sub>3</sub>, 500 MHz, ppm): δ 7.55 (d, *J* = 8.9 Hz, 2H), 7.49 (d, *J* = 8.2 Hz, 2H), 7.25 (d, *J* = 8.7 Hz, 2H), 6.95 (d, *J* = 8.9 Hz, 2H), 3.81 (s, 3H), 2.37 (s, 3H); <sup>13</sup>C NMR (CDCl<sub>3</sub>, 125 MHz, ppm): δ 161.9, 142.7, 141.3, 137.0, 129.9, 127.1, 124.8, 114.8, 55.5, 21.4; MS (EI); [M+H]<sup>+</sup>: 247.1.

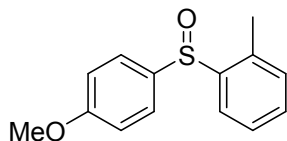

**1-(4-Methoxyphenylsulfinyl)-2-methylbenzene**<sup>[1]</sup>, Compound **3ac** was obtained in 80% yield according to the general procedure. <sup>1</sup>H NMR (CDCl<sub>3</sub>, 500 MHz, ppm): δ 8.03-8.01 (m, 1H), 7.52 (d, *J* = 8.9 Hz, 2H), 7.44 (t, *J* = 7.6 Hz, 1H), 7.38-7.35 (m, 1H), 7.15 (d, *J* = 7.5 Hz, 1H), 6.93 (d, *J* = 8.9 Hz, 2H), 3.81 (s, 3H), 2.26 (s, 3H); <sup>13</sup>C NMR (CDCl<sub>3</sub>, 125 MHz, ppm): δ 162.0, 142.8, 135.5, 135.3, 130.9, 130.8, 128.5, 127.0, 124.2, 114.8, 55.5, 18.5; MS (EI); [M+H]<sup>+</sup>: 247.2.

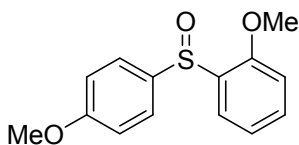

**1-Methoxy-2-(4-methoxyphenylsulfinyl)benzene**, Compound **3ad** was obtained in 82% yield according to the general procedure. <sup>1</sup>H NMR (CDCl<sub>3</sub>, 500 MHz, ppm): δ 7.94-7.92 (m, 1H), 7.61 (d, *J* = 8.8 Hz, 2H), 7.42-7.38 (m, 1H), 7.16 (t, *J* = 7.5 Hz, 1H), 6.91 (d, *J* = 8.8 Hz, 2H), 6.84 (d, *J* = 8.2 Hz, 1H), 3.80 (s, 3H), 3.77 (s, 3H); <sup>13</sup>C NMR (CDCl<sub>3</sub>, 125 MHz, ppm): δ 116.7, 115.5, 136.6, 133.3, 132.0, 127.5, 124.5, 121.5, 114.4, 111.0, 55.7, 55.4; HRMS calc. for C<sub>14</sub>H<sub>15</sub>O<sub>3</sub>S (M+H)<sup>+</sup>, 263.0742; found, 263.0745.

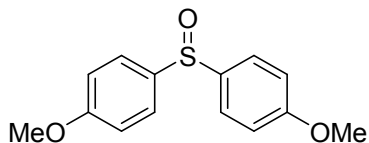

**4,4'-Sulfinylbis(methoxybenzene)**, Compound **3ae** was obtained in 81% yield according to the general procedure. <sup>1</sup>H NMR (CDCl<sub>3</sub>, 500 MHz, ppm): δ 7.53 (d, *J* = 8.8 Hz, 4H),

6.95 (d,  $J = 8.8$  Hz, 4H), 3.82 (s, 6H);  $^{13}\text{C}$  NMR ( $\text{CDCl}_3$ , 125 MHz, ppm):  $\delta$  161.8, 137.0, 126.9, 114.7, 55.5; HRMS calc. for  $\text{C}_{14}\text{H}_{15}\text{O}_3\text{S}$  ( $\text{M}+\text{H}$ ) $^+$ , 263.0742; found, 263.0746.

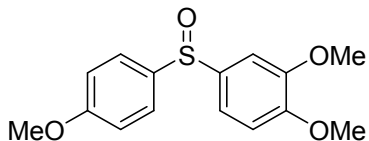

**4,4'-Sulfinylbis(methoxybenzene)**, Compound **3af** was obtained in 66% yield according to the general procedure.  $^1\text{H}$  NMR ( $\text{CDCl}_3$ , 500 MHz, ppm):  $\delta$  7.54 (d,  $J = 8.8$  Hz, 2H), 7.16 – 7.14 (m, 2H), 6.96 (d,  $J = 8.8$  Hz, 2H), 6.91 (d,  $J = 8.8$  Hz, 1H), 3.89 (s, 3H), 3.88 (s, 3H), 3.82 (s, 3H);  $^{13}\text{C}$  NMR ( $\text{CDCl}_3$ , 125 MHz, ppm):  $\delta$  161.9, 151.3, 149.9, 137.1, 137.0, 126.9, 118.5, 114.7, 111.0, 107.0, 56.1, 56.1, 55.5; HRMS calc. for  $\text{C}_{15}\text{H}_{17}\text{O}_4\text{S}$  ( $\text{M}+\text{H}$ ) $^+$ , 293.0848; found, 293.0849.

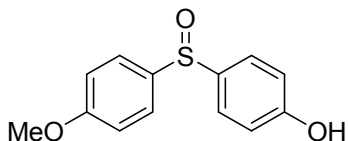

**4-(4-Methoxyphenylsulfinyl)phenol**, Compound **3ag** was obtained in 81% yield according to the general procedure.  $^1\text{H}$  NMR ( $\text{CDCl}_3$ , 500 MHz, ppm):  $\delta$  7.49 (d,  $J = 8.8$  Hz, 2H), 7.38 (d,  $J = 8.6$  Hz, 2H), 6.95 (d,  $J = 8.8$  Hz, 2H), 6.88 (d,  $J = 8.7$  Hz, 2H), 3.81 (s, 3H).  $^{13}\text{C}$  NMR ( $\text{CDCl}_3$ , 125 MHz, ppm):  $\delta$  162.0, 160.3, 135.2, 133.9, 127.7, 127.1, 116.7, 114.9, 55.5; HRMS calc. for  $\text{C}_{13}\text{H}_{13}\text{O}_3\text{S}$  ( $\text{M}+\text{H}$ ) $^+$ , 249.0585; found, 249.0589.

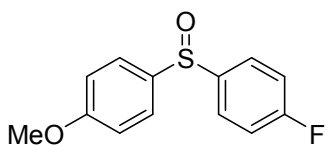

**1-Fluoro-4-(4-methoxyphenylsulfinyl)benzene**<sup>[1]</sup>, Compound **3ah** was obtained in 77% yield according to the general procedure.  $^1\text{H}$  NMR ( $\text{CDCl}_3$ , 500 MHz, ppm):  $\delta$  7.62 – 7.58 (m, 2H), 7.55 (d,  $J = 8.9$  Hz, 2H), 7.15 (t,  $J = 8.6$  Hz, 2H), 6.97 (d,  $J = 8.8$  Hz, 2H), 3.82 (s, 3H).  $^{13}\text{C}$  NMR ( $\text{CDCl}_3$ , 125 MHz, ppm):  $\delta$  164.2 (d,  $J_{\text{CF}} = 250.0$  Hz), 162.2, 141.3 (d,  $J_{\text{CF}} = 2.9$  Hz), 136.4, 127.2, 127.0 (d,  $J_{\text{CF}} = 8.9$  Hz), 116.5 (d,  $J_{\text{CF}} = 22.4$  Hz), 114.9, 55.5; MS (EI);  $[\text{M}+\text{H}]^+$ : 251.1.



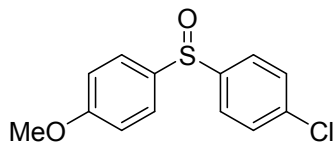

**1-Chloro-4-(4-methoxyphenylsulfinyl)benzene**<sup>[1]</sup>, Compound **3ai** was obtained in 68% yield according to the general procedure. <sup>1</sup>H NMR (CDCl<sub>3</sub>, 500 MHz, ppm): δ 7.58 – 7.52 (m, 4H), 7.43 (d, *J* = 8.6 Hz, 2H), 6.97 (d, *J* = 8.8 Hz, 2H), 3.83 (s, 3H); <sup>13</sup>C NMR (CDCl<sub>3</sub>, 125 MHz, ppm): δ 162.3, 144.3, 137.0, 136.2, 129.5, 127.3, 126.0, 115.0, 55.6; MS (EI); [M+H]<sup>+</sup>: 267.2.

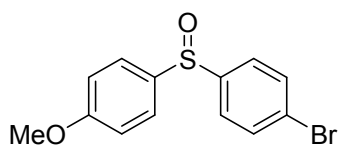

**1-Bromo-4-(4-methoxyphenylsulfinyl)benzene**, Compound **3aj** was obtained in 58% yield according to the general procedure. <sup>1</sup>H NMR (CDCl<sub>3</sub>, 500 MHz, ppm): δ 7.59 (d, *J* = 8.6 Hz, 2H), 7.55 (d, *J* = 8.9 Hz, 2H), 7.47 (d, *J* = 8.6 Hz, 2H), 6.96 (d, *J* = 8.9 Hz, 2H), 3.82 (s, 3H); <sup>13</sup>C NMR (CDCl<sub>3</sub>, 125 MHz, ppm): δ 162.3, 145.0, 136.2, 132.4, 127.3, 126.1, 125.2, 115.0, 55.6; HRMS calc. for C<sub>13</sub>H<sub>12</sub>BrO<sub>2</sub>S (M+H)<sup>+</sup>, 310.9741; found, 310.9743.

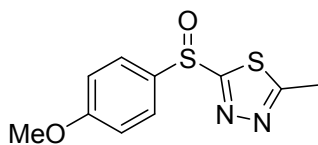

**2-(4-Methoxyphenylsulfinyl)-5-methyl-1,3,4-thiadiazole**, Compound **3ak** was obtained in 46% yield according to the general procedure. <sup>1</sup>H NMR (CDCl<sub>3</sub>, 500 MHz, ppm): δ 7.74 (d, *J* = 8.8 Hz, 2H), 7.04 (d, *J* = 8.8 Hz, 2H), 3.85 (s, 3H), 2.79 (s, 3H); <sup>13</sup>C NMR (CDCl<sub>3</sub>, 125 MHz, ppm): δ 162.9, 133.7, 126.9, 126.5, 115.3, 114.7, 55.6, 16.1; HRMS calc. for C<sub>10</sub>H<sub>11</sub>N<sub>2</sub>O<sub>2</sub>S<sub>2</sub> (M+H)<sup>+</sup>, 255.0262; found, 255.0265.

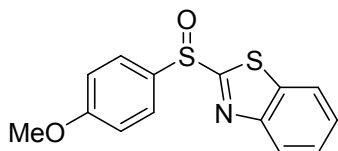

**2-(4-Methoxyphenylsulfinyl)benzo[d]thiazole**, Compound **3al** was obtained in 47% yield according to the general procedure.  $^1\text{H}$  NMR ( $\text{CDCl}_3$ , 500 MHz, ppm):  $\delta$  8.02 (d,  $J$  = 7.9 Hz, 1H), 7.93 (d,  $J$  = 8.1 Hz, 1H), 7.81 (d,  $J$  = 8.9 Hz, 2H), 7.53 – 7.48 (m, 1H), 7.46 – 7.41 (m, 1H), 7.01 (d,  $J$  = 8.9 Hz, 2H), 3.82 (s, 3H);  $^{13}\text{C}$  NMR ( $\text{CDCl}_3$ , 125 MHz, ppm):  $\delta$  178.7, 162.9, 153.8, 135.9, 134.0, 127.1, 126.8, 126.3, 124.2, 122.3, 115.2, 55.6; HRMS calc. for  $\text{C}_{14}\text{H}_{12}\text{NO}_2\text{S}_2$  ( $\text{M}+\text{H}$ ) $^+$ , 290.0309; found, 290.0308.

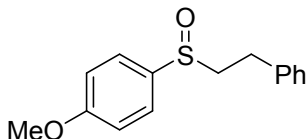

**1-Methoxy-4-(phenethylsulfinyl)benzene**, Compound **3am** was obtained in 73% yield according to the general procedure.  $^1\text{H}$  NMR ( $\text{CDCl}_3$ , 500 MHz, ppm):  $\delta$  7.58 (d,  $J$  = 8.8 Hz, 2H), 7.29 (t,  $J$  = 7.4 Hz, 2H), 7.21 (t,  $J$  = 7.4 Hz, 1H), 7.17 (d,  $J$  = 7.1 Hz, 2H), 7.03 (d,  $J$  = 8.7 Hz, 2H), 3.86 (s, 3H), 3.06 – 3.02 (m, 3H), 2.92-2.88 (m, 1H);  $^{13}\text{C}$  NMR ( $\text{CDCl}_3$ , 125 MHz, ppm):  $\delta$  162.0, 138.9, 134.5, 128.7, 128.5, 126.7, 126.0, 114.8, 58.5, 55.6, 28.3; HRMS calc. for  $\text{C}_{15}\text{H}_{17}\text{O}_2\text{S}$  ( $\text{M}+\text{H}$ ) $^+$ , 261.0949; found, 261.0951.

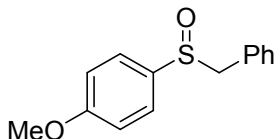

**1-(Benzylsulfinyl)-4-methoxybenzene**, Compound **3an** was obtained in 73% yield according to the general procedure.  $^1\text{H}$  NMR ( $\text{CDCl}_3$ , 500 MHz, ppm):  $\delta$  7.31 (d,  $J$  = 8.8 Hz, 2H), 7.28 - 7.26 (m, 1H), 7.25 – 7.23 (m, 2H), 6.98 (d,  $J$  = 6.5 Hz, 2H), 6.92 (d,  $J$  = 8.8 Hz, 2H), 4.12 (d,  $J$  = 12.5 Hz, 1H), 3.96 (d,  $J$  = 12.5 Hz, 1H), 3.84 (s, 3H);  $^{13}\text{C}$  NMR ( $\text{CDCl}_3$ , 125 MHz, ppm):  $\delta$  162.1, 133.6, 130.4, 129.3, 128.5, 128.2, 126.4, 114.4, 63.8, 55.5; HRMS calc. for  $\text{C}_{14}\text{H}_{15}\text{O}_2\text{S}$  ( $\text{M}+\text{H}$ ) $^+$ , 247.0793; found, 247.0791.

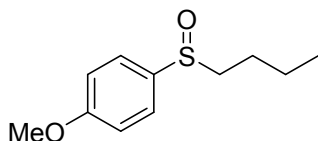

**1-(Butylsulfinyl)-4-methoxybenzene**, Compound **3ao** was obtained in 80% yield according to the general procedure.  $^1\text{H}$  NMR ( $\text{CDCl}_3$ , 500 MHz, ppm):  $\delta$  7.57 (d,  $J$  = 8.7

Hz, 2H), 7.03 (d,  $J = 8.7$  Hz, 2H), 3.86 (s, 3H), 2.86 – 2.72 (m, 2H), 1.68 – 1.57 (m, 2H), 1.48 – 1.40 (m, 2H), 0.92 (t,  $J = 7.3$  Hz, 3H);  $^{13}\text{C}$  NMR ( $\text{CDCl}_3$ , 125 MHz, ppm):  $\delta$  161.9, 134.9, 126.0, 114.7, 57.2, 55.5, 24.3, 21.9, 13.7; HRMS calc. for  $\text{C}_{11}\text{H}_{17}\text{O}_2\text{S}$  ( $\text{M}+\text{H}$ ) $^+$ , 213.0949; found, 213.0951.

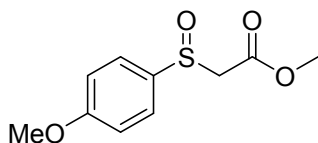

**2-(4-Methoxyphenylsulfinyl)acetate**, Compound **3ap** was obtained in 70% yield according to the general procedure.  $^1\text{H}$  NMR ( $\text{CDCl}_3$ , 500 MHz, ppm):  $\delta$  7.55 (d,  $J = 8.8$  Hz, 2H), 6.96 (d,  $J = 8.8$  Hz, 2H), 3.80 (d,  $J = 13.6$  Hz, 1H), 3.79 (s, 3H), 3.63 (s, 3H), 3.57 (d,  $J = 13.6$  Hz, 1H);  $^{13}\text{C}$  NMR ( $\text{CDCl}_3$ , 125 MHz, ppm):  $\delta$  164.2, 161.5, 132.8, 125.2, 113.9, 60.6, 54.6, 51.7; HRMS calc. for  $\text{C}_{10}\text{H}_{13}\text{O}_4\text{S}$  ( $\text{M}+\text{H}$ ) $^+$ , 229.0535; found, 229.0537.

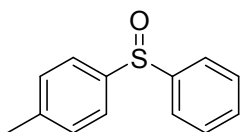

**1-Methyl-4-(phenylsulfinyl)benzene**<sup>[2]</sup>, Compound **3ba** was obtained in 74% yield according to the general procedure.  $^1\text{H}$  NMR ( $\text{CDCl}_3$ , 500 MHz, ppm):  $\delta$  7.57 – 7.55 (m, 2H), 7.46 (d,  $J = 8.2$  Hz, 2H), 7.40 – 7.35 (m, 3H), 7.19 (d,  $J = 7.9$  Hz, 2H), 2.29 (s, 3H);  $^{13}\text{C}$  NMR ( $\text{CDCl}_3$ , 125 MHz, ppm):  $\delta$  145.8, 142.5, 141.7, 130.9, 130.1, 129.3, 125.0, 124.7, 21.4; MS (EI);  $[\text{M}+\text{H}]^+$ : 217.2.

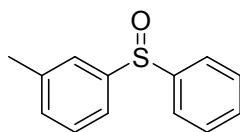

**1-Methyl-3-(phenylsulfinyl)benzene**<sup>[3]</sup>, Compound **3ca** was obtained in 72% yield according to the general procedure.  $^1\text{H}$  NMR ( $\text{CDCl}_3$ , 500 MHz, ppm):  $\delta$  7.67 – 7.62 (m, 2H), 7.49 – 7.43 (m, 4H), 7.42 (d,  $J = 7.7$  Hz, 1H), 7.33 (t,  $J = 7.6$  Hz, 1H), 7.24 (d,  $J = 7.5$  Hz, 1H), 2.38 (s, 3H);  $^{13}\text{C}$  NMR ( $\text{CDCl}_3$ , 125 MHz, ppm):  $\delta$  145.7, 145.4, 139.6, 132.0, 131.0, 129.3, 129.1, 125.0, 124.8, 122.0, 21.4; MS (EI);  $[\text{M}+\text{H}]^+$ : 217.2.

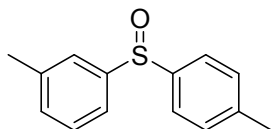

**1-Methyl-3-(p-tolylsulfinyl)benzene**, Compound **3cb** was obtained in 66% yield according to the general procedure.  $^1\text{H}$  NMR ( $\text{CDCl}_3$ , 500 MHz, ppm):  $\delta$  7.53 (d,  $J = 8.2$  Hz, 2H), 7.47 (s, 1H), 7.39 (d,  $J = 7.8$  Hz, 1H), 7.32 (t,  $J = 7.6$  Hz, 1H), 7.25 (d,  $J = 6.5$  Hz, 2H), 7.23 (d,  $J = 7.5$  Hz, 1H), 2.37 (s, 3H), 2.37 (s, 3H);  $^{13}\text{C}$  NMR ( $\text{CDCl}_3$ , 125 MHz, ppm):  $\delta$  145.6, 142.6, 141.5, 139.5, 131.8, 130.0, 129.1, 125.0, 124.9, 121.9, 21.4, 21.4; HRMS calc. for  $\text{C}_{14}\text{H}_{15}\text{OS}$  ( $\text{M}+\text{H}$ ) $^+$ , 231.0844; found, 231.0845.

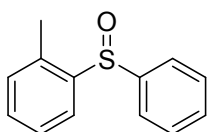

**1-Methyl-2-(phenylsulfinyl)benzene**,<sup>[5]</sup> Compound **3da** was obtained in 68% yield according to the general procedure.  $^1\text{H}$  NMR ( $\text{CDCl}_3$ , 500 MHz, ppm):  $\delta$  7.95 – 7.94 (m, 1H), 7.61 – 7.59 (m, 2H), 7.46 – 7.43 (m, 3H), 7.41 (d,  $J = 7.5$  Hz, 1H), 7.37 – 7.35 (m, 1H), 7.17 (d,  $J = 7.3$  Hz, 1H), 2.36 (s, 3H);  $^{13}\text{C}$  NMR ( $\text{CDCl}_3$ , 125 MHz, ppm):  $\delta$  144.6, 142.9, 135.8, 131.1, 131.0, 131.0, 129.3, 127.2, 125.9, 124.8, 18.6; MS (EI);  $[\text{M}+\text{H}]^+$ : 217.1.

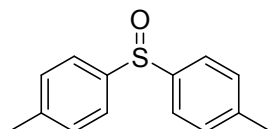

**4,4'-Sulfinylbis(methylbenzene)**<sup>[3]</sup>, Compound **3bb** was obtained in 70% yield according to the general procedure.  $^1\text{H}$  NMR ( $\text{CDCl}_3$ , 500 MHz, ppm):  $\delta$  7.51 (d,  $J = 8.2$  Hz, 4H), 7.25 (d,  $J = 8.0$  Hz, 4H), 2.36 (s, 6H);  $^{13}\text{C}$  NMR ( $\text{CDCl}_3$ , 125 MHz, ppm):  $\delta$  142.6, 141.5, 130.0, 124.9, 21.4; MS (EI);  $[\text{M}+\text{H}]^+$ : 231.1.

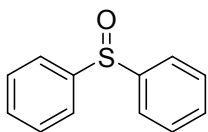

**Sulfinyldibenzene**<sup>[4]</sup>, Compound **3ea** was obtained in 68% yield according to the general procedure. <sup>1</sup>H NMR (CDCl<sub>3</sub>, 500 MHz, ppm): δ 7.66 – 7.64 (m, 4H), 7.48 – 7.43 (m, 6H); <sup>13</sup>C NMR (CDCl<sub>3</sub>, 125 MHz, ppm): δ 145.2, 131.1, 129.3, 124.8; MS (EI); [M+H]<sup>+</sup>: 203.1.

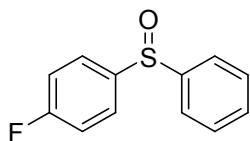

**1-Fluoro-4-(phenylsulfinyl)benzene**<sup>[4]</sup>, Compound **3fa** was obtained in 68% yield according to the general procedure. <sup>1</sup>H NMR (CDCl<sub>3</sub>, 500 MHz, ppm): δ 7.70 – 7.59 (m, 4H), 7.50 – 7.44 (m, 3H), 7.15 (t, *J* = 8.6 Hz, 2H); <sup>13</sup>C NMR (CDCl<sub>3</sub>, 125 MHz, ppm): δ 164.3 (d, *J* = 250.4Hz), 145.4, 141.2, 131.2, 129.4, 127.2 (d, *J* = 8.9Hz), 124.7, 116.8, 116.7 (d, *J* = 22.4Hz); MS (EI); [M+H]<sup>+</sup>: 221.1.

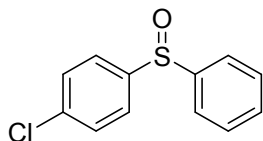

**1-Chloro-4-(phenylsulfinyl)benzene**<sup>[2]</sup>, Compound **3ga** was obtained in 72% yield according to the general procedure. <sup>1</sup>H NMR (CDCl<sub>3</sub>, 500 MHz, ppm): δ 7.64 – 7.62 (m, 2H), 7.58 (d, *J* = 8.5 Hz, 2H), 7.49 – 7.46 (m, 3H), 7.43 (d, *J* = 8.5 Hz, 2H); <sup>13</sup>C NMR (CDCl<sub>3</sub>, 125 MHz, ppm): δ 145.4, 144.3, 137.3, 131.4, 129.6, 129.5, 126.1, 124.7; MS (EI); [M+H]<sup>+</sup>: 237.0.

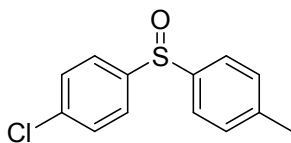

**1-Chloro-4-(p-tolylsulfinyl)benzene**<sup>[2]</sup>, Compound **3gb** was obtained in 67% yield according to the general procedure. <sup>1</sup>H NMR (CDCl<sub>3</sub>, 500 MHz, ppm): δ 7.57 – 7.55 (m, 2H), 7.51 (d, *J* = 8.2 Hz, 2H), 7.43 – 7.42 (m, 2H), 2.37 (s, 3H); <sup>13</sup>C NMR (CDCl<sub>3</sub>, 125 MHz, ppm): δ 144.4, 142.1, 142.1, 137.1, 130.2, 129.6, 126.0, 125.0, 21.4; MS (EI); [M+H]<sup>+</sup>: 251.0.

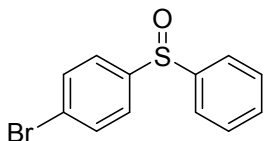

**1-Bromo-4-(phenylsulfinyl)benzene**<sup>[5]</sup>, Compound **3ha** was obtained in 55% yield according to the general procedure. <sup>1</sup>H NMR (CDCl<sub>3</sub>, 500 MHz, ppm):  $\delta$  7.64 – 7.62 (m, 2H), 7.59 (d,  $J$  = 8.6 Hz, 2H), 7.51 (d,  $J$  = 8.6 Hz, 2H), 7.48 – 7.46 (m, 3H); <sup>13</sup>C NMR (CDCl<sub>3</sub>, 125 MHz, ppm):  $\delta$  145.2, 144.8, 132.6, 131.4, 129.5, 126.3, 125.6, 124.7; MS (EI); [M+H]<sup>+</sup>: 281.2.

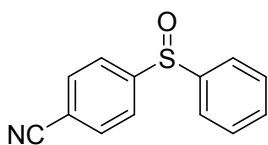

**4-(Phenylsulfinyl)benzonitrile**<sup>[6]</sup>, Compound **3ia** was obtained in 62% yield according to the general procedure. <sup>1</sup>H NMR (CDCl<sub>3</sub>, 500 MHz, ppm):  $\delta$  7.79 – 7.73 (m, 4H), 7.68 – 7.64 (m, 2H), 7.51 – 7.49 (m, 3H); <sup>13</sup>C NMR (CDCl<sub>3</sub>, 125 MHz, ppm):  $\delta$  151.2, 144.5, 133.0, 132.0, 129.8, 125.0, 124.9, 117.7, 114.7; MS (EI); [M+H]<sup>+</sup>: 228.1.

## References:

- [1] Dong Hyuk Kim, Juyoung Lee, and Anna Lee, *Org. Lett.* **2018**, 20, 764–767
- [2] Yiming Li, Ming Wang, and Xuefeng Jiang, *ACS Catal.*, **2017**, 7, 7587–7592.
- [3] Frédéric Izquierdo, Anthony Chartoire and Steven P. Nolan, *ACS Catal.* **2013**, 3, 2190–2193
- [4] Tiezheng Jia, Mengnan Zhang, Irina K. Sagamanova, Carol Y. Wang, and Patrick J. Walsh, *Org. Lett.* **2015**, 17, 1168–1171.
- [5] Hao Yu, Zhen Li, and Carsten Bolm, *Org. Lett.* **2018**, 20, 7104–7106.
- [6] Tiezheng Jia, Mengnan Zhang, Irina K. Sagamanova, Carol Y. Wang, and Patrick J. Walsh, *Org. Lett.*, **2015**, 17, 1168 - 1171.

## 6. Copies of NMR Spectra for 3aa–3ia

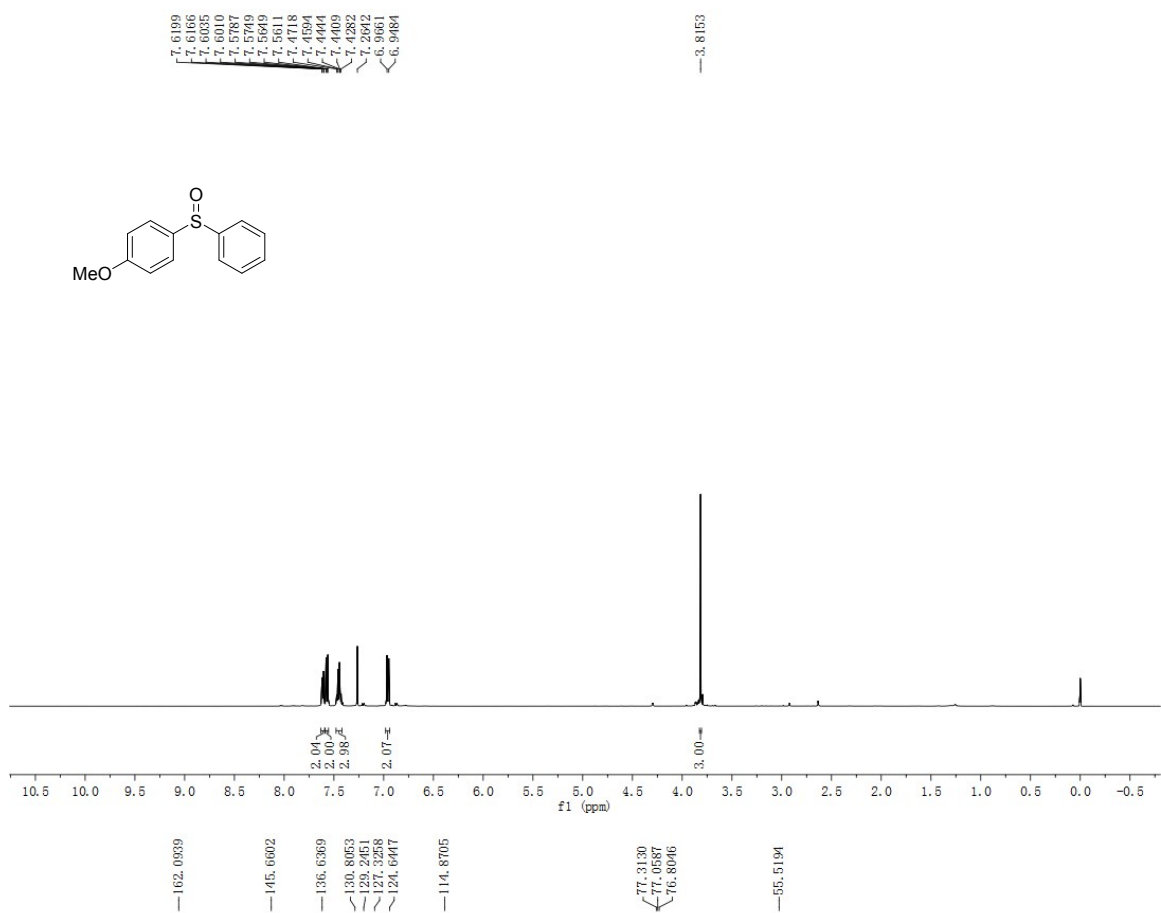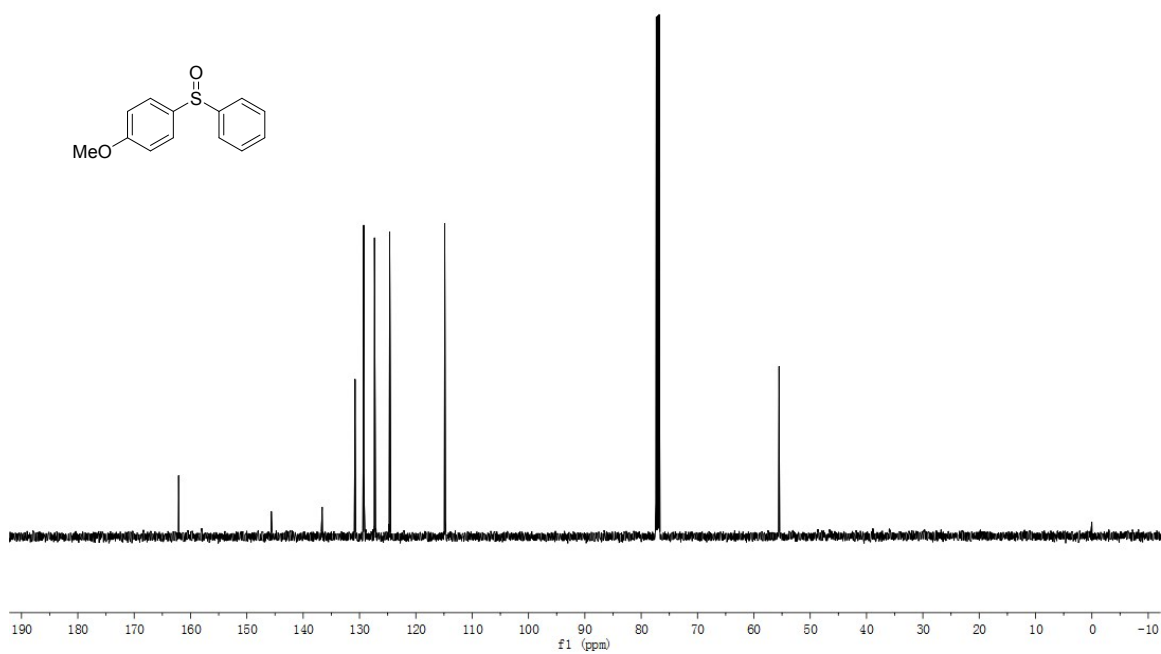

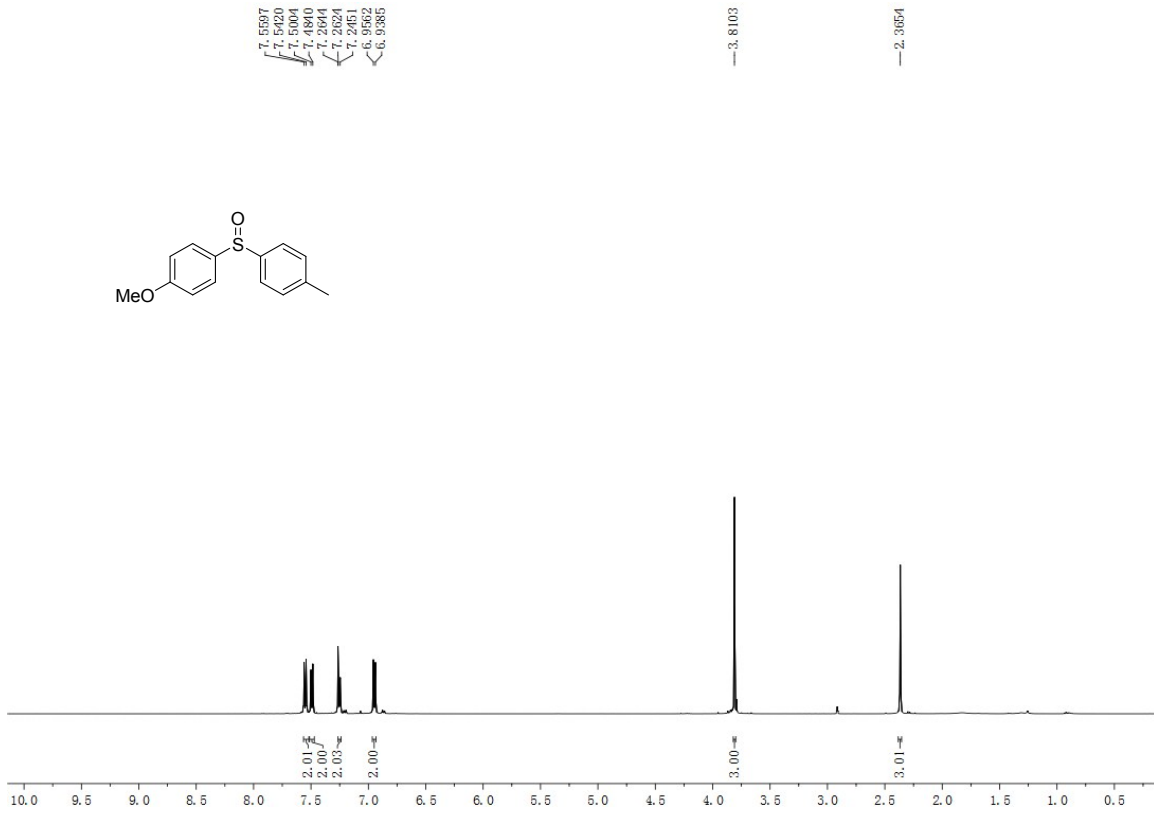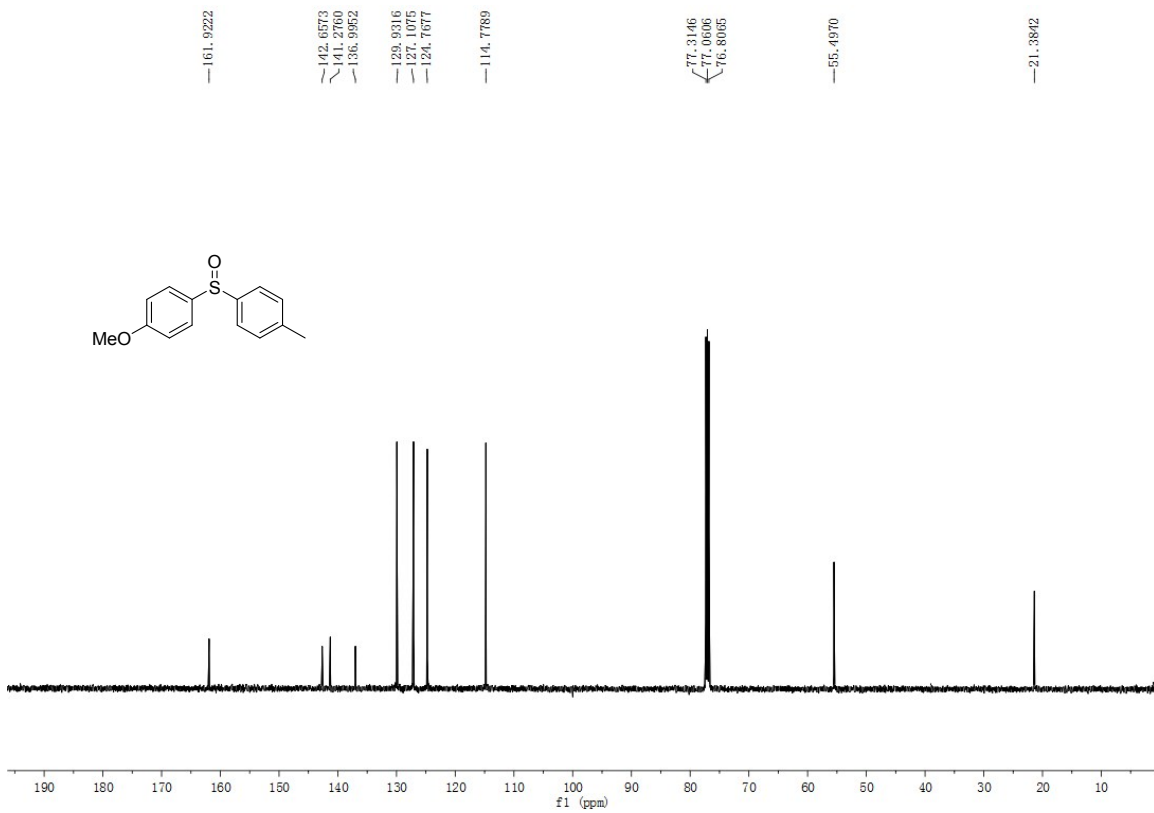



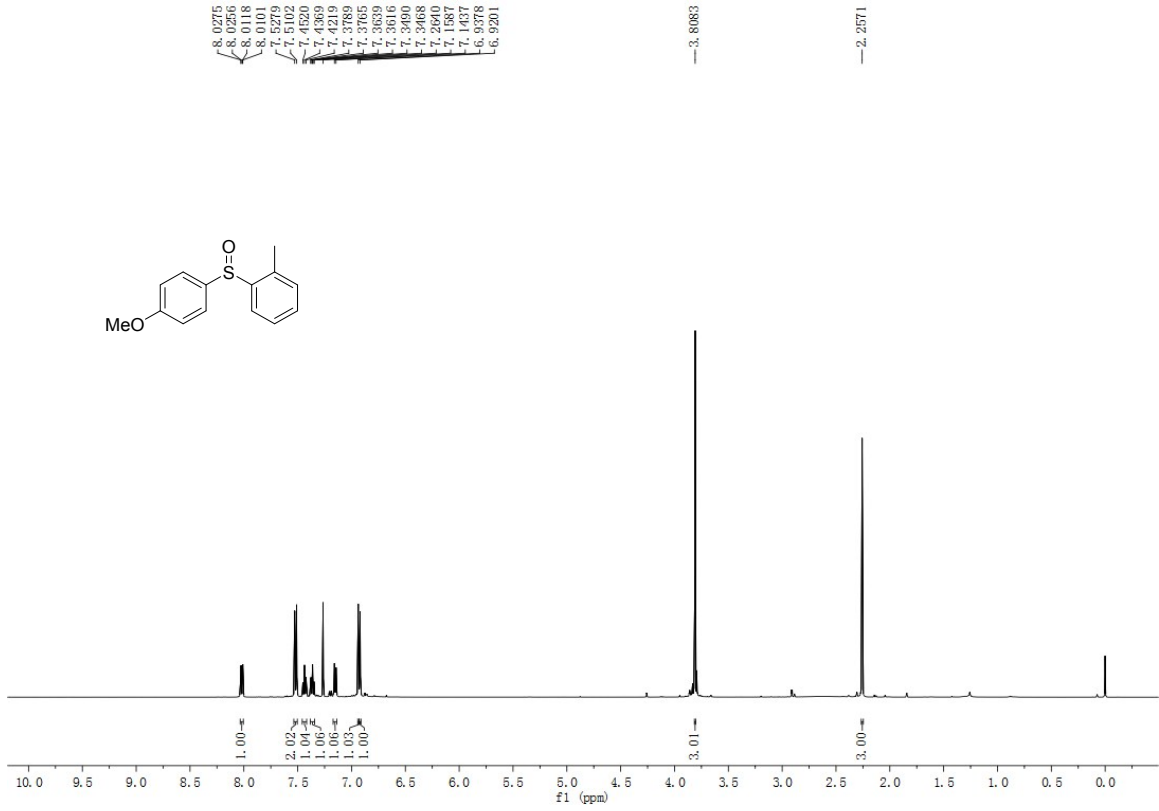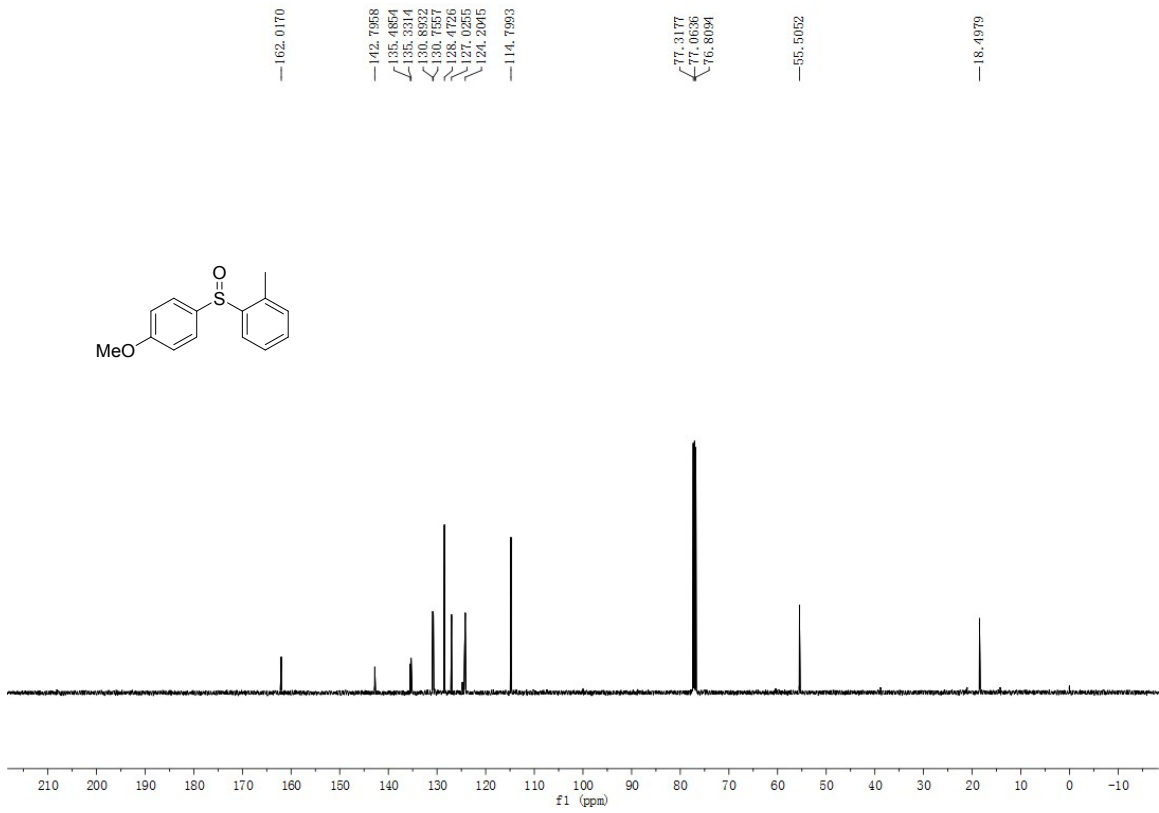

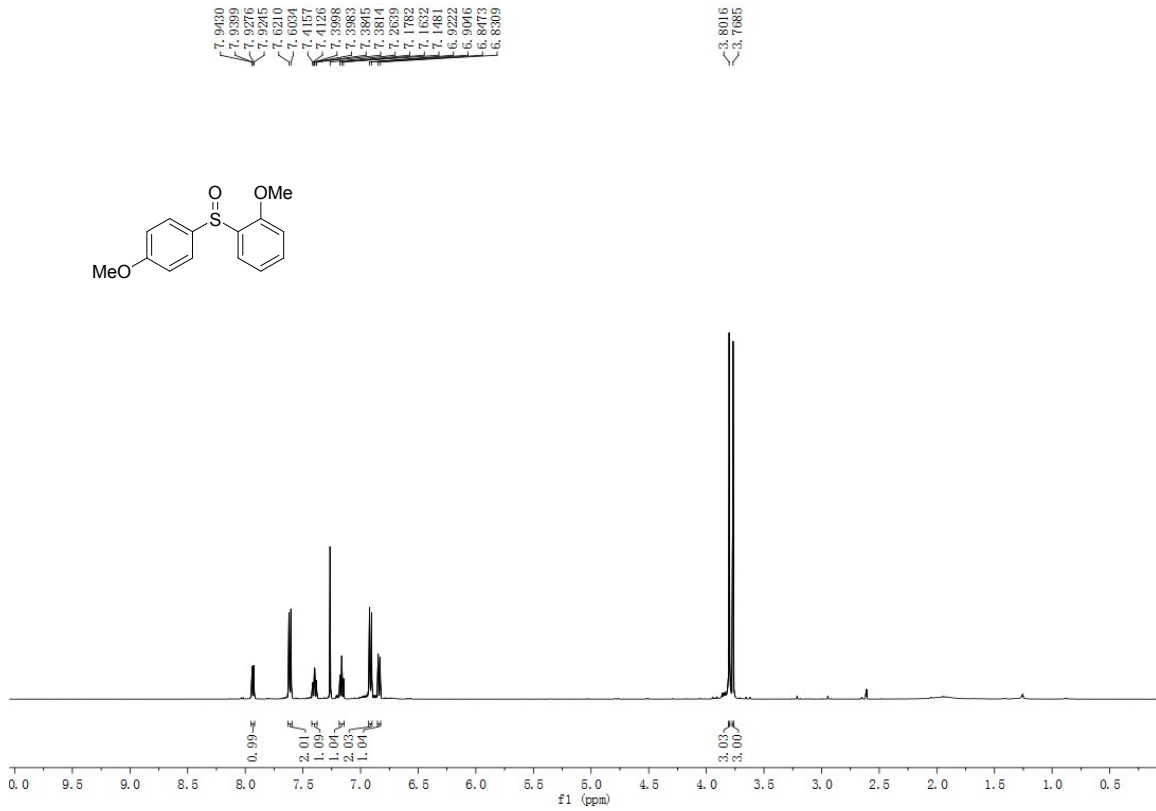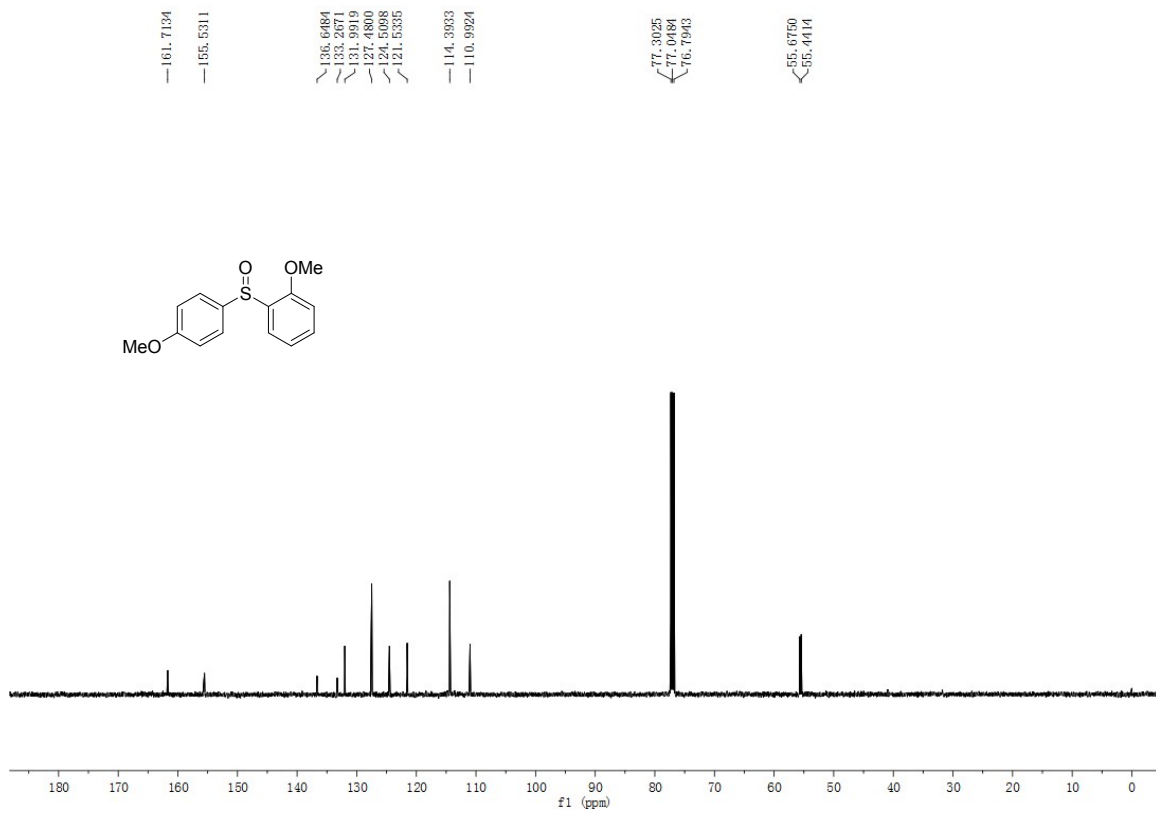

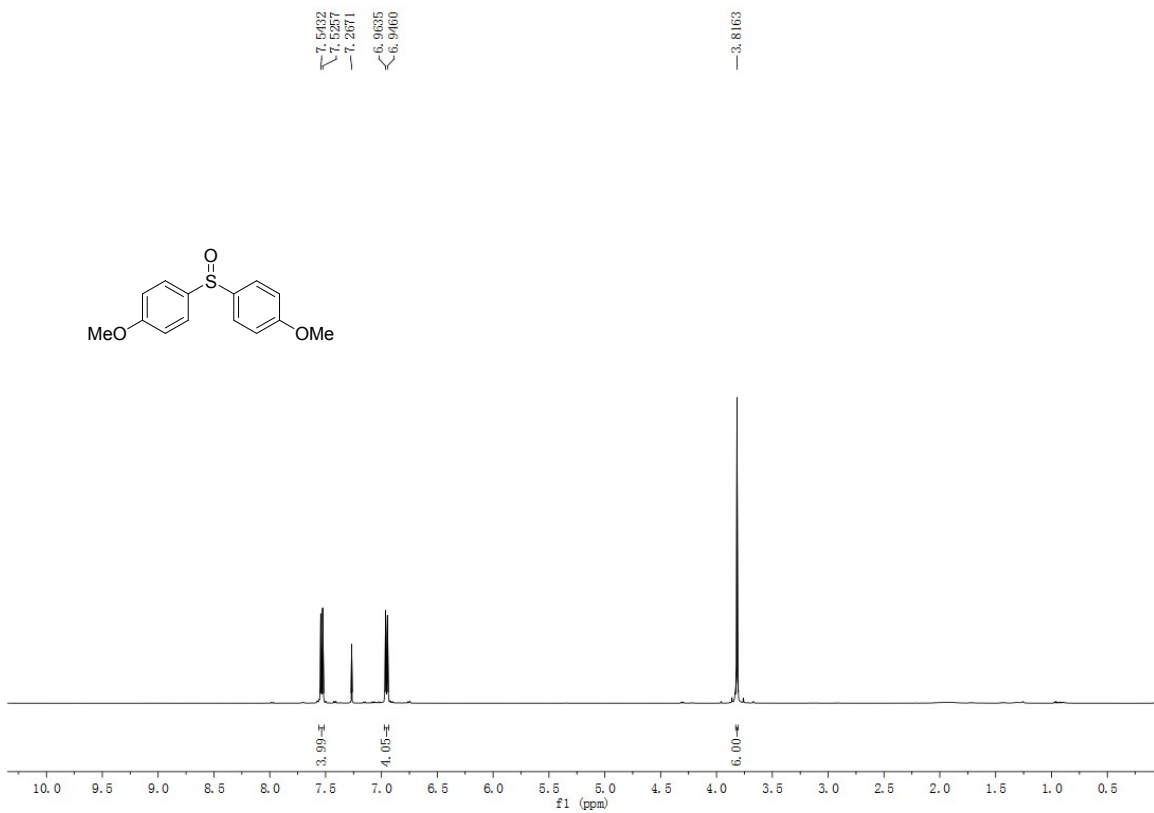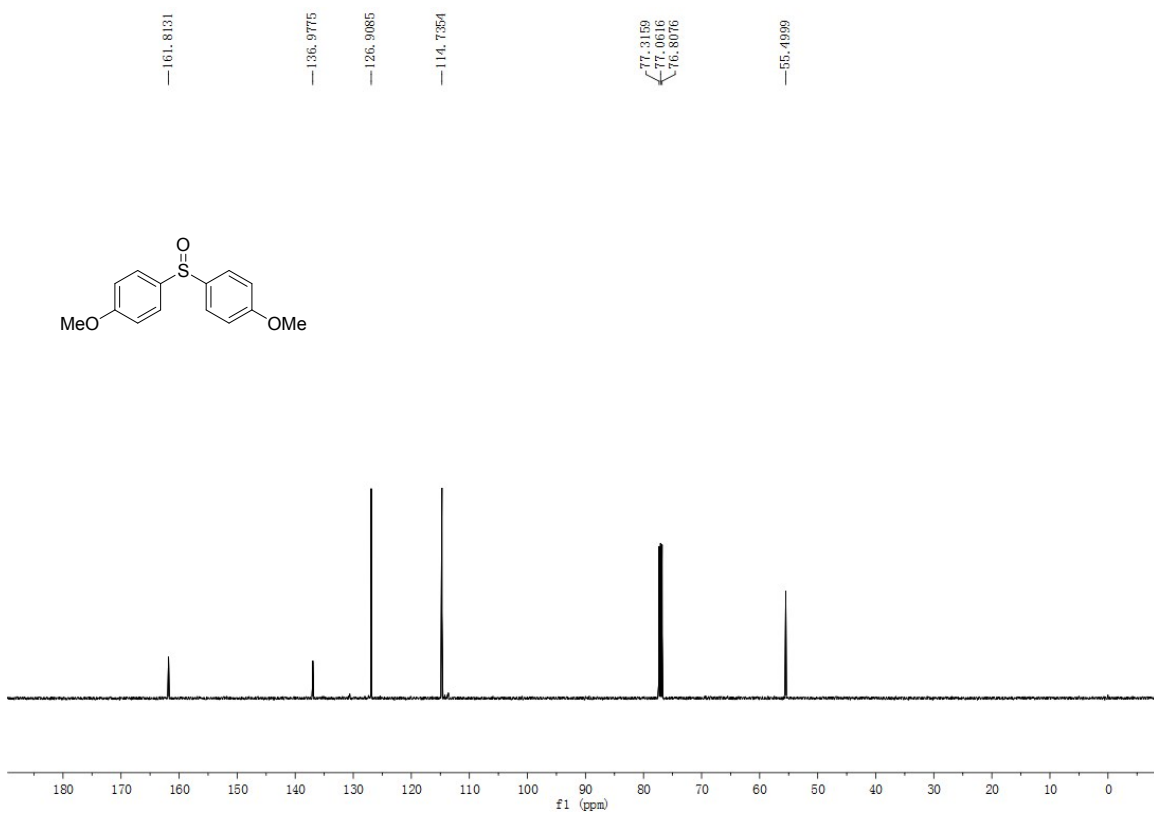

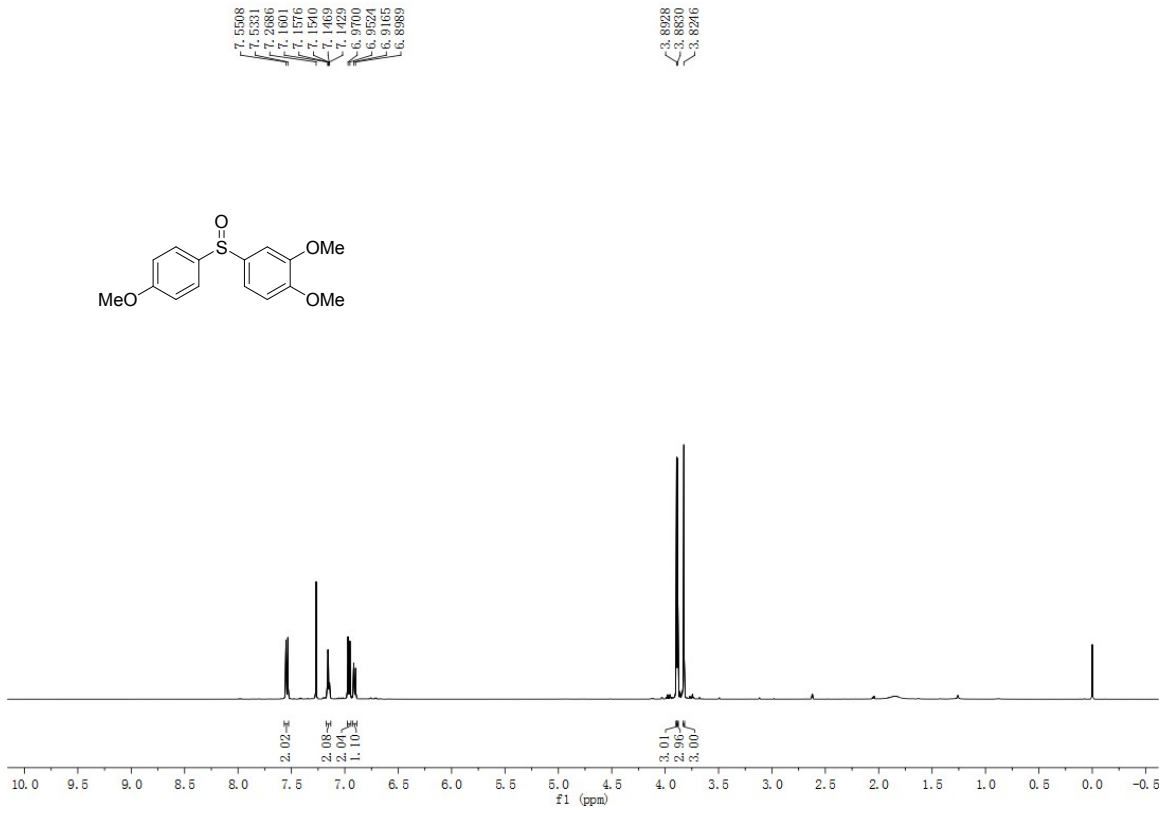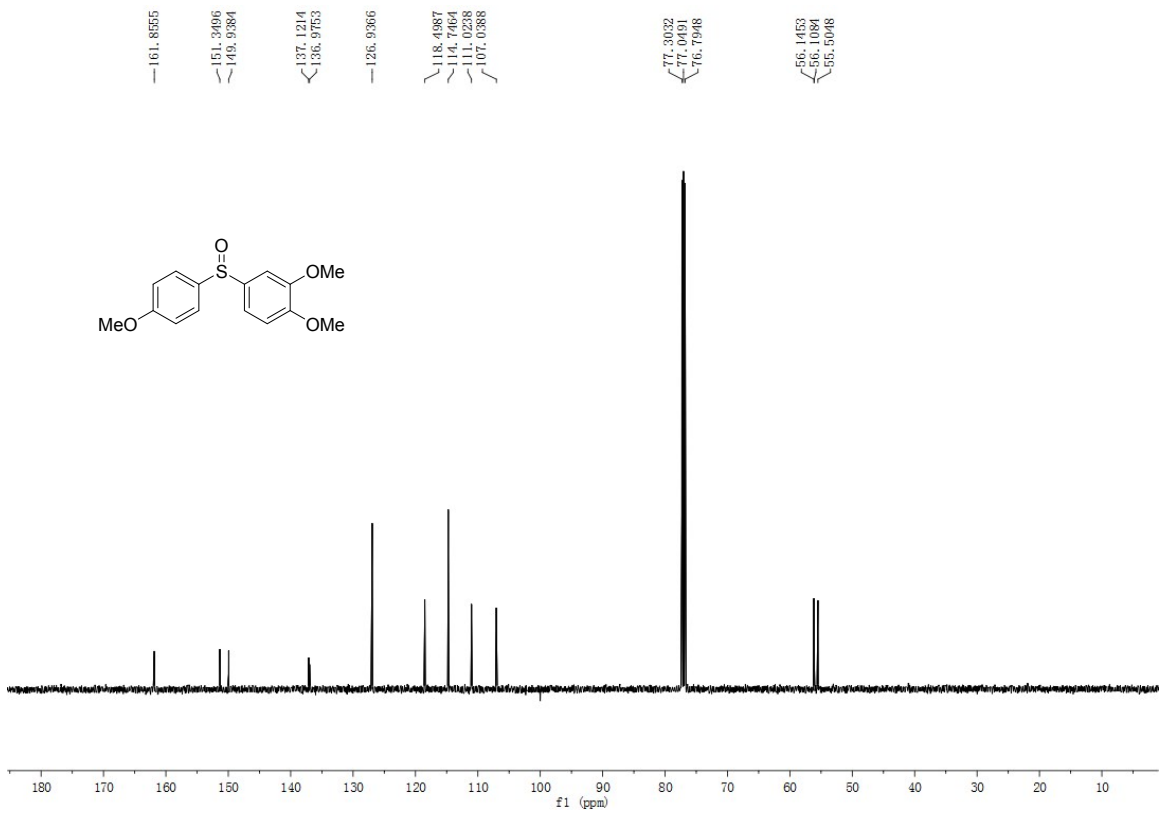

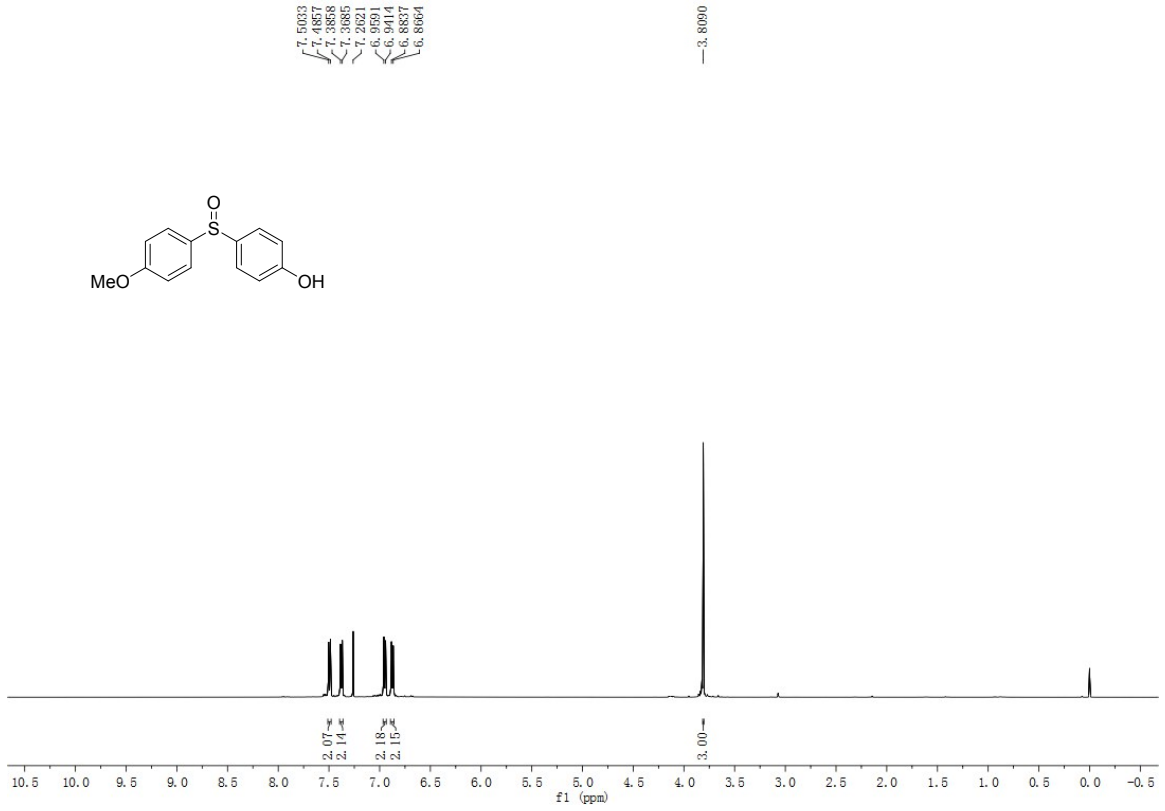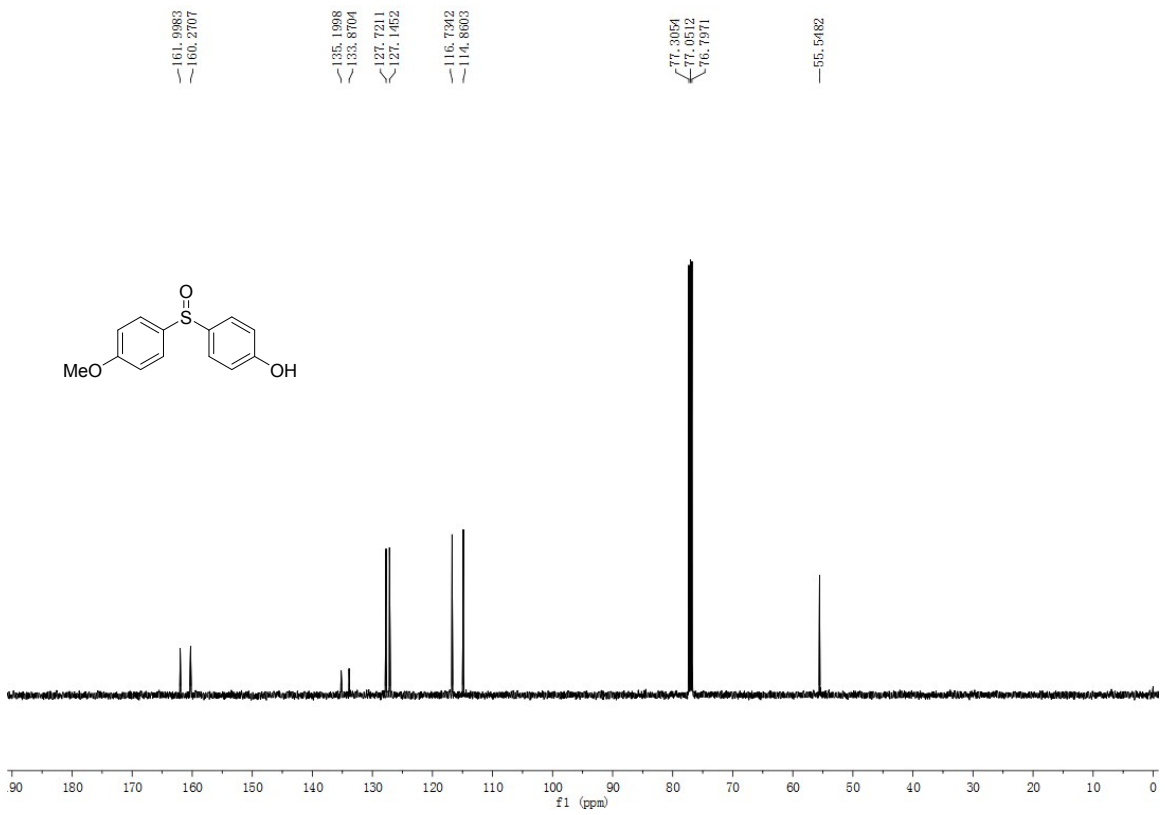

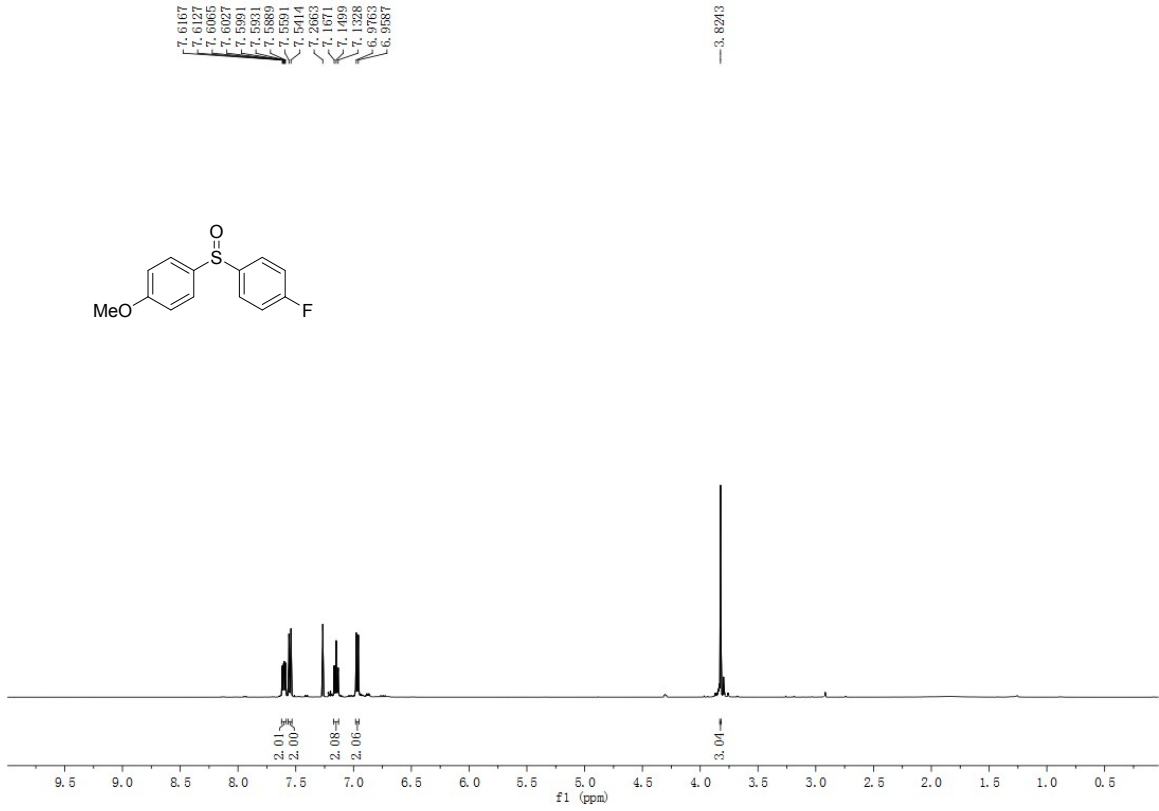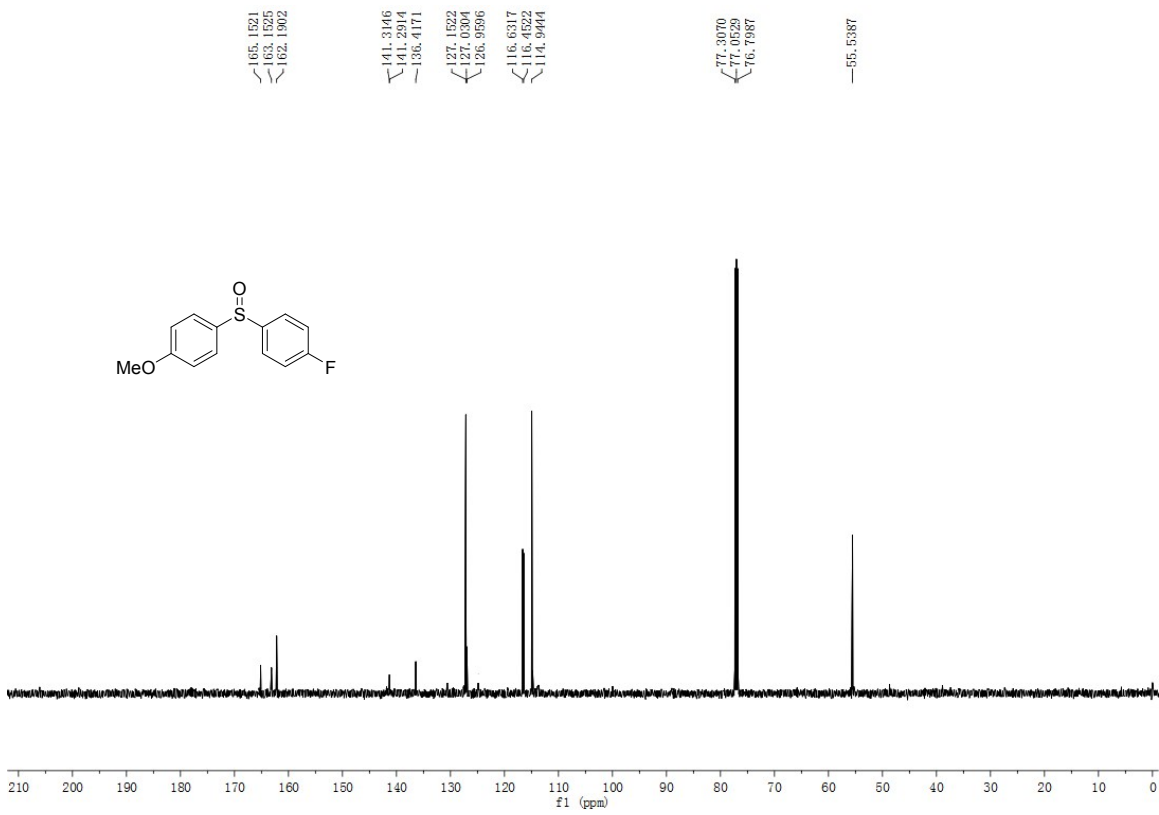

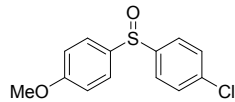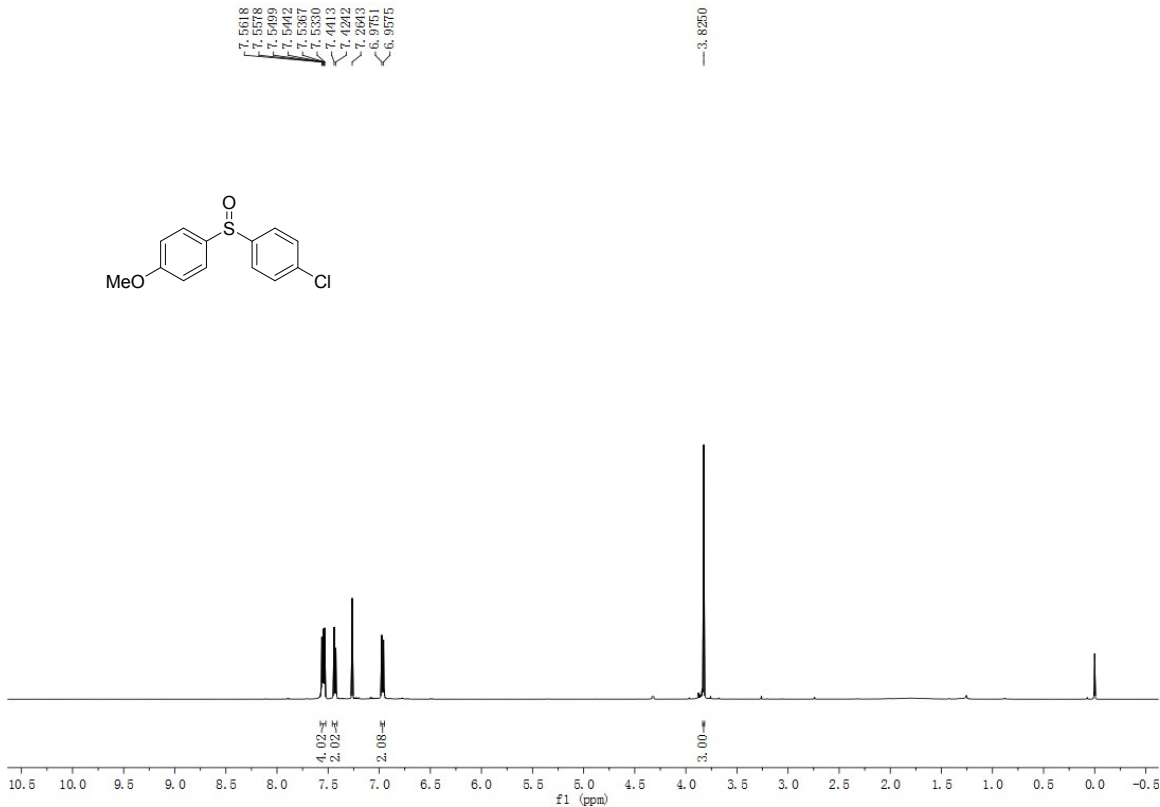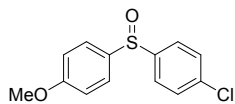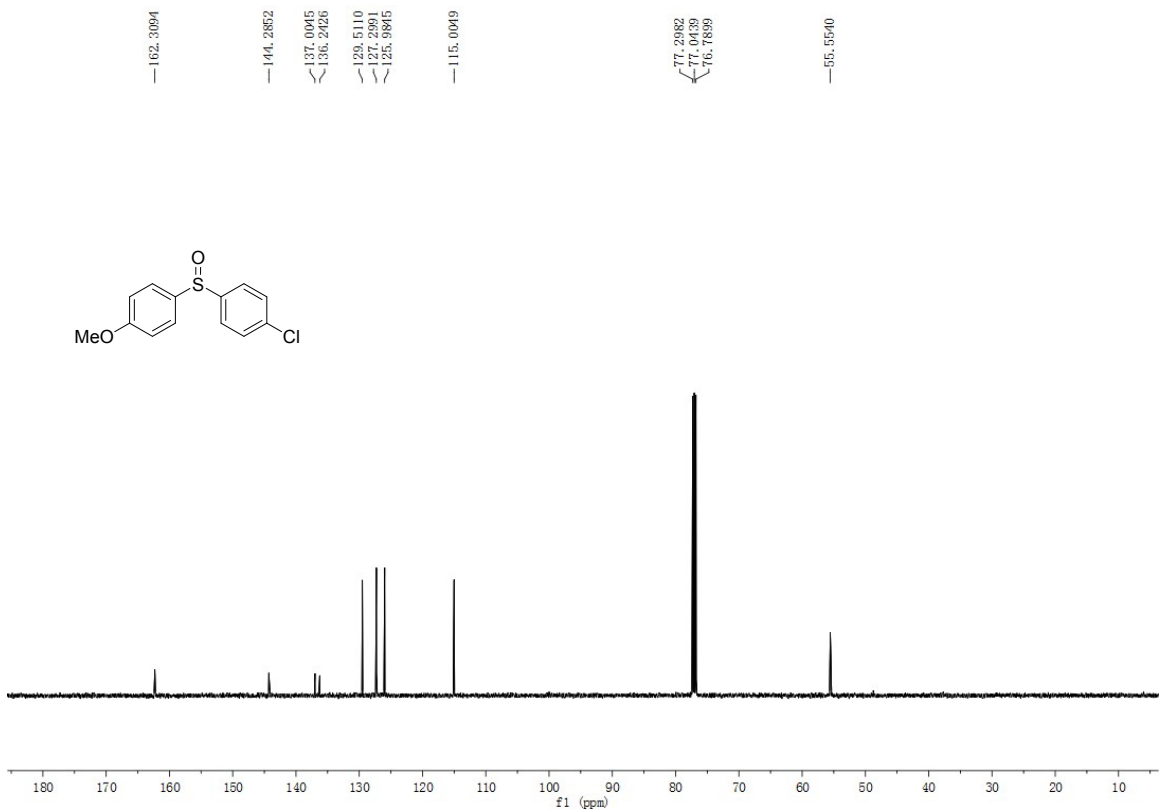

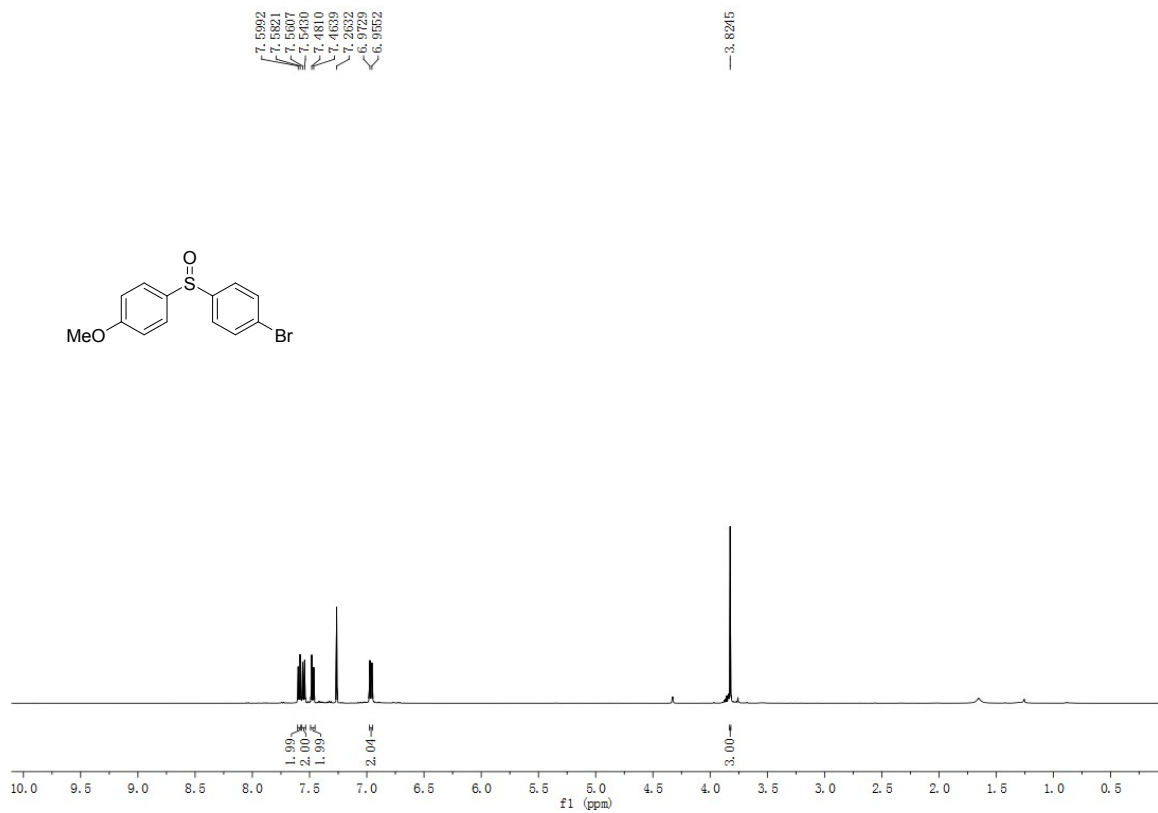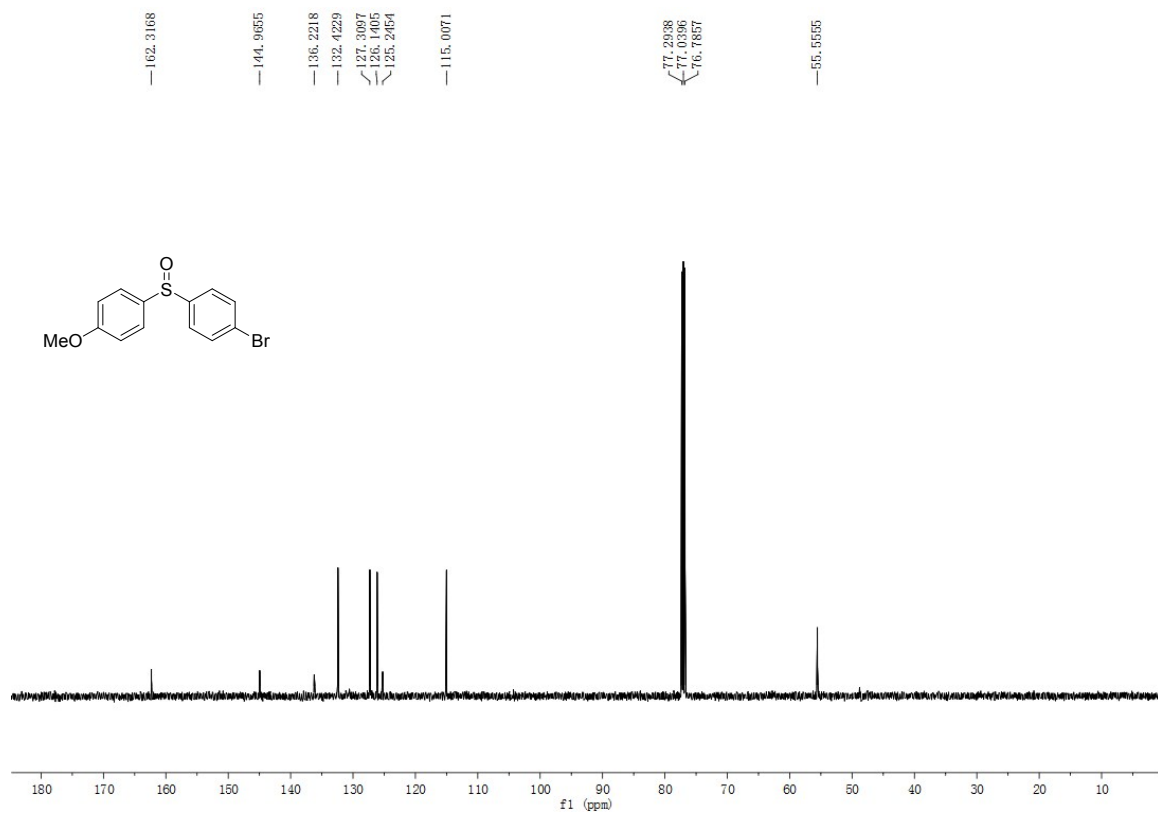



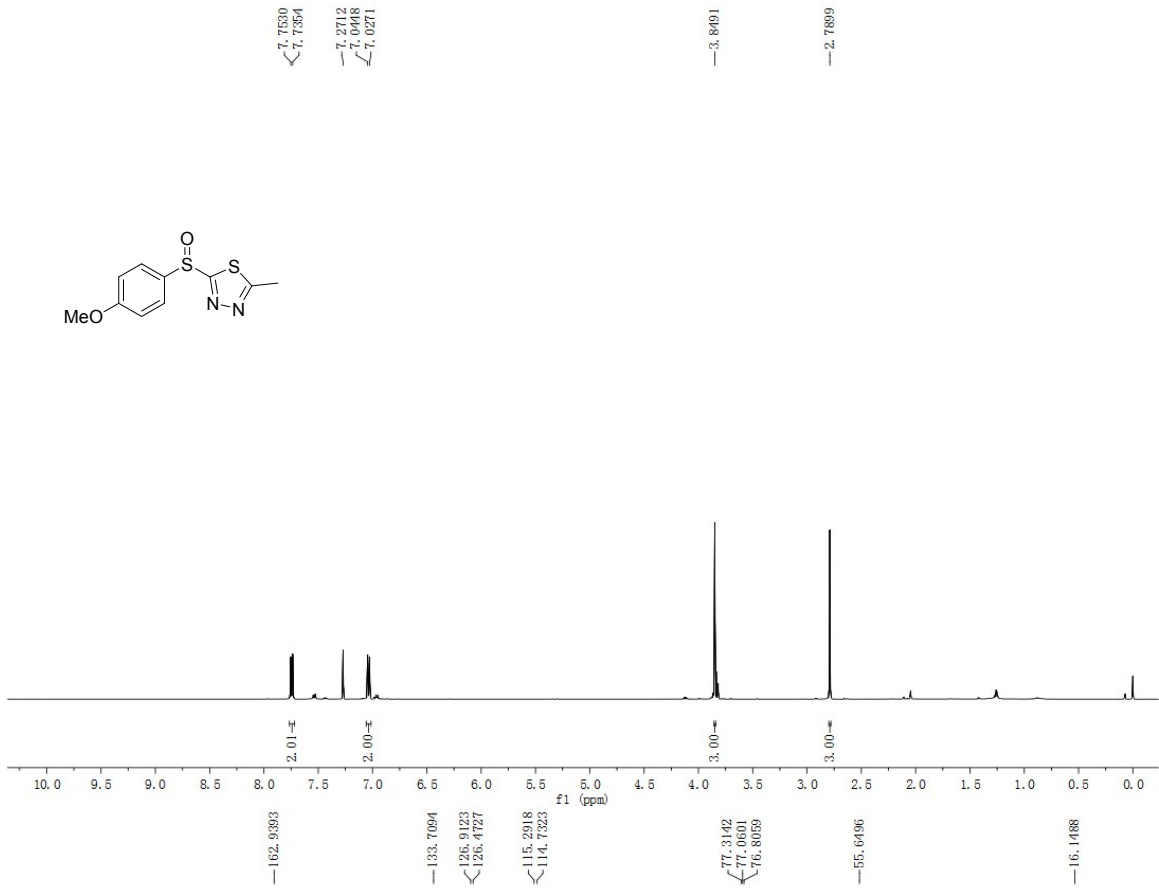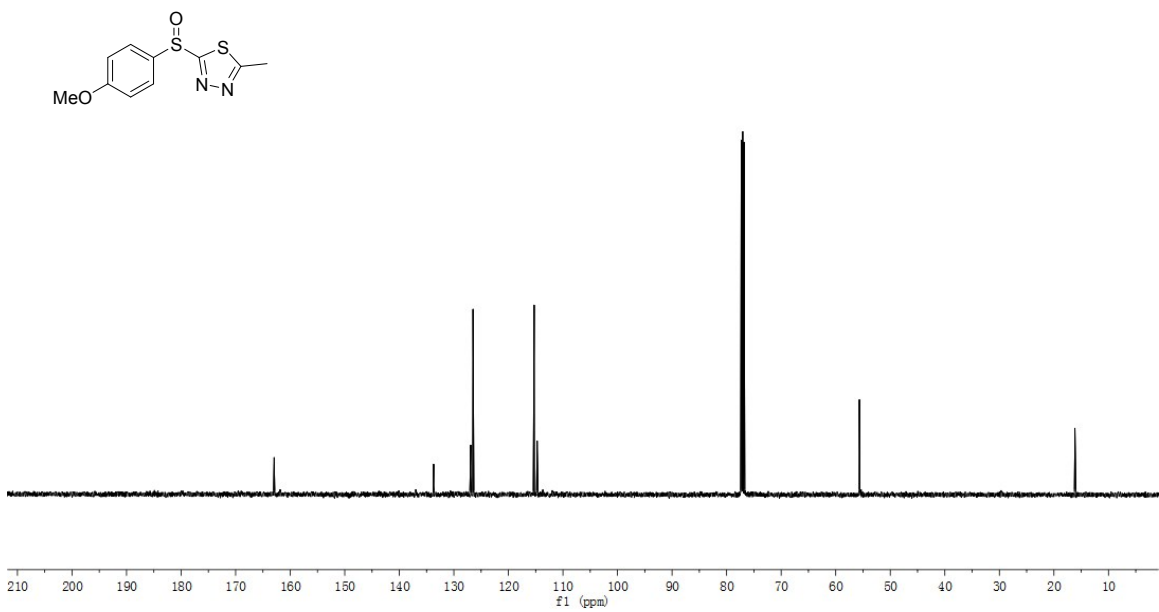

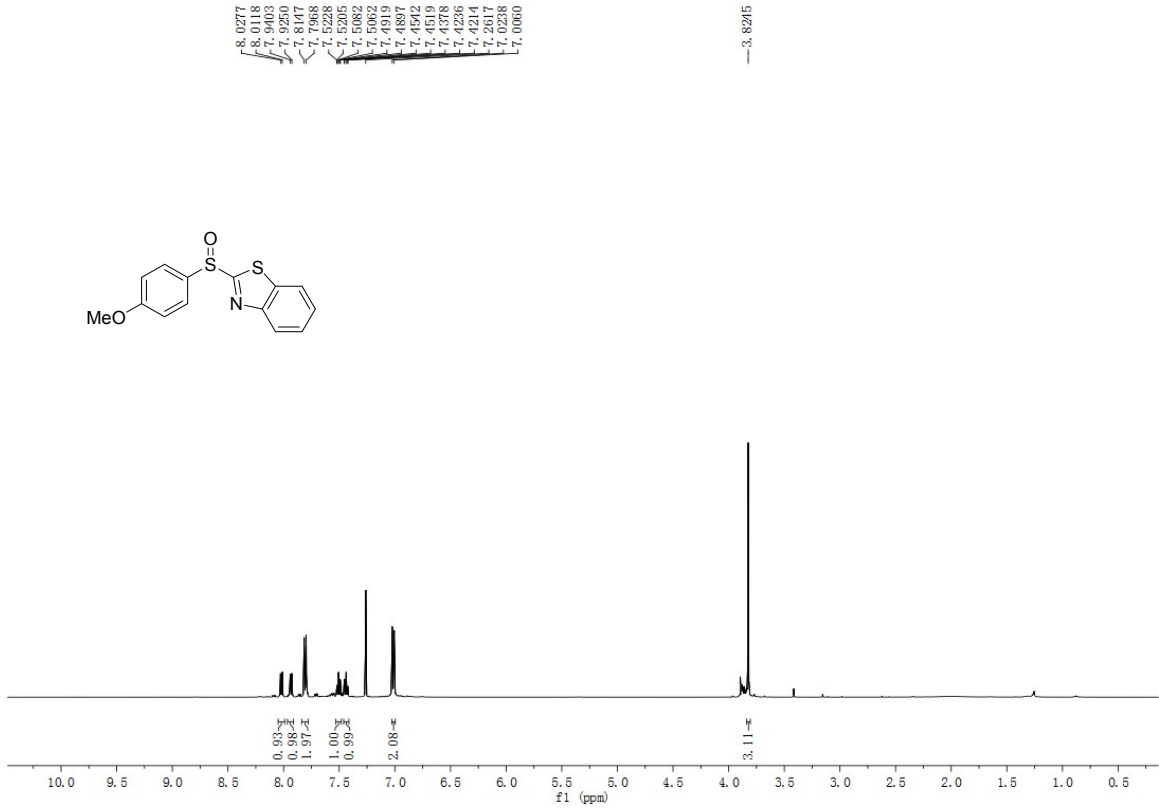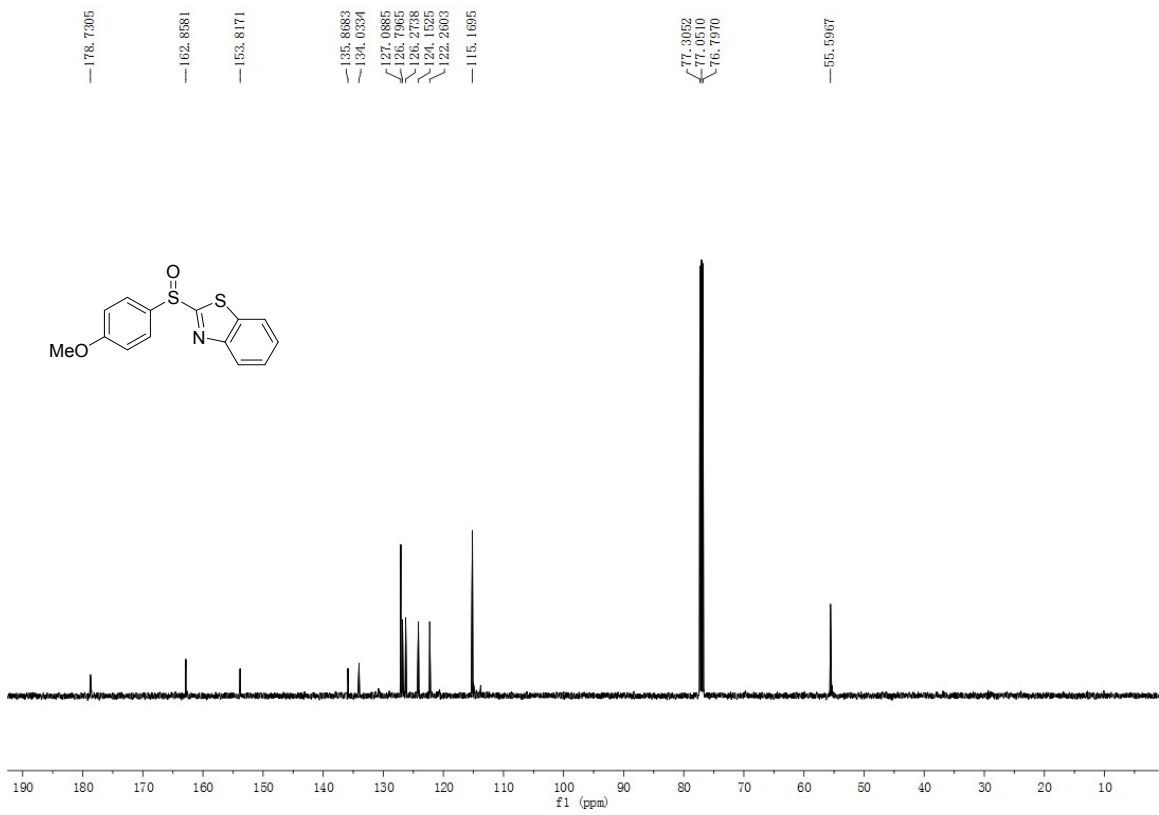

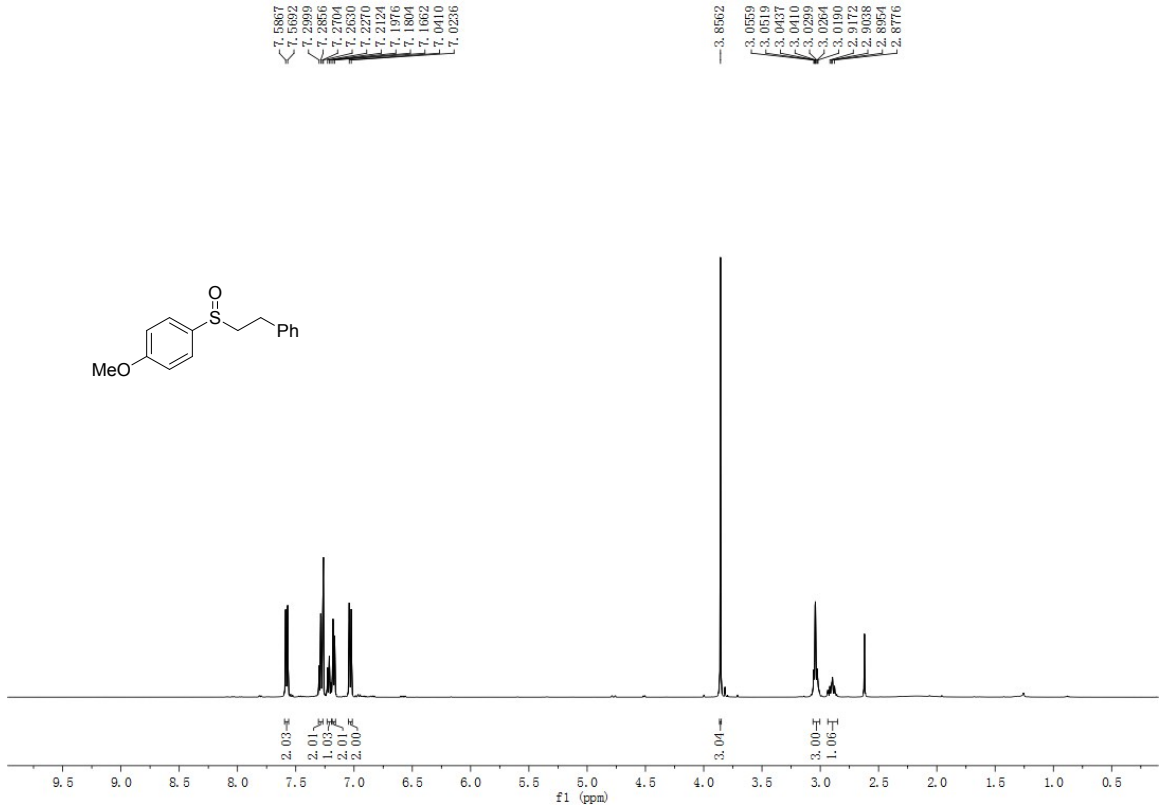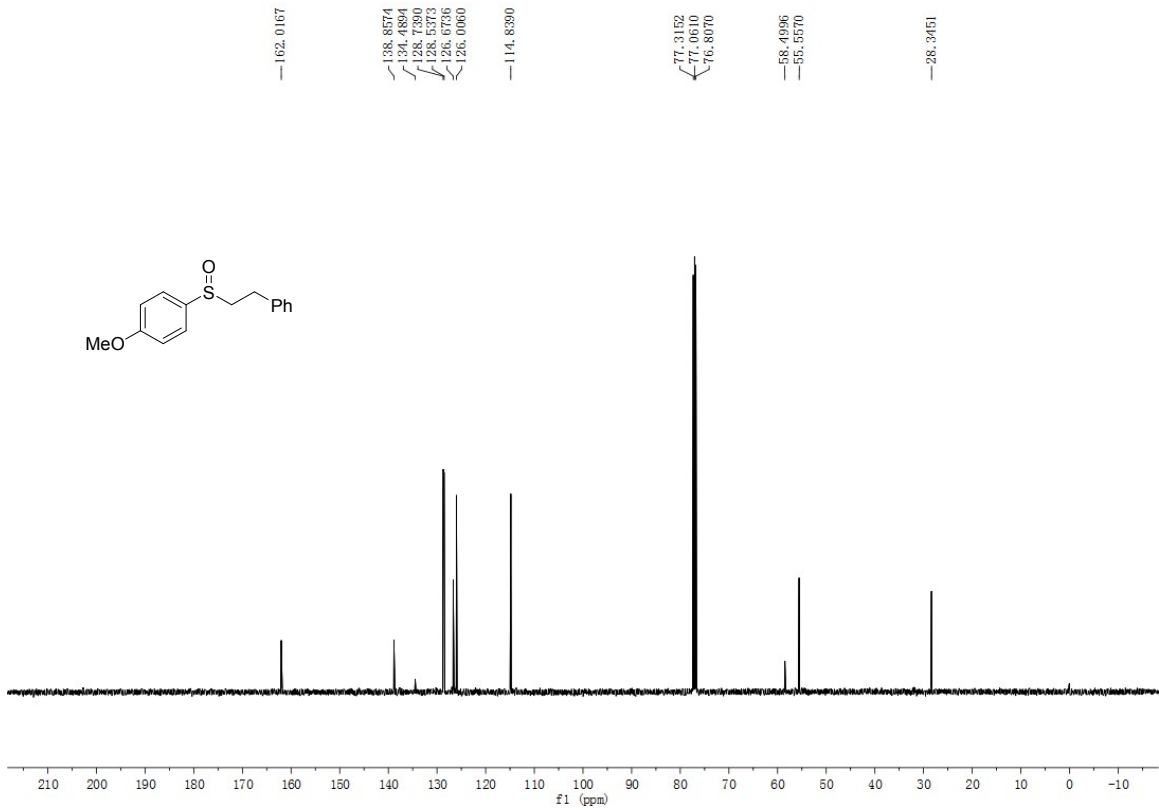

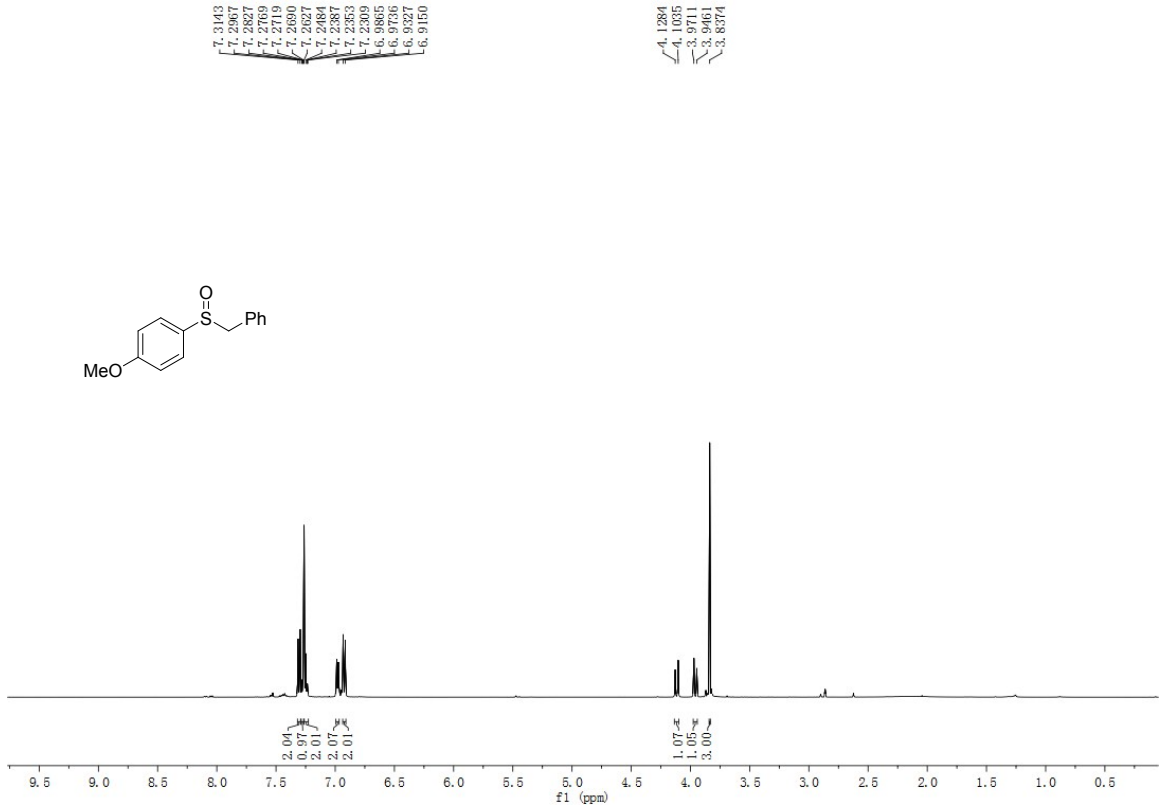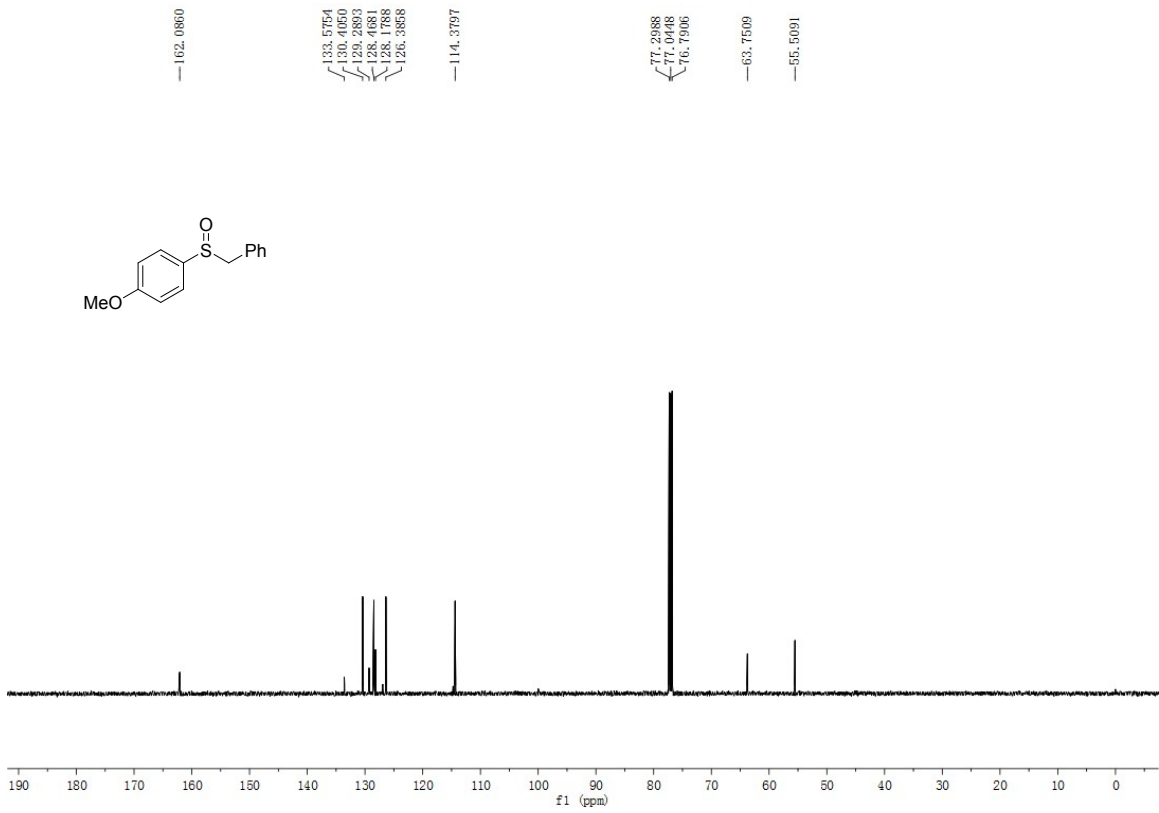

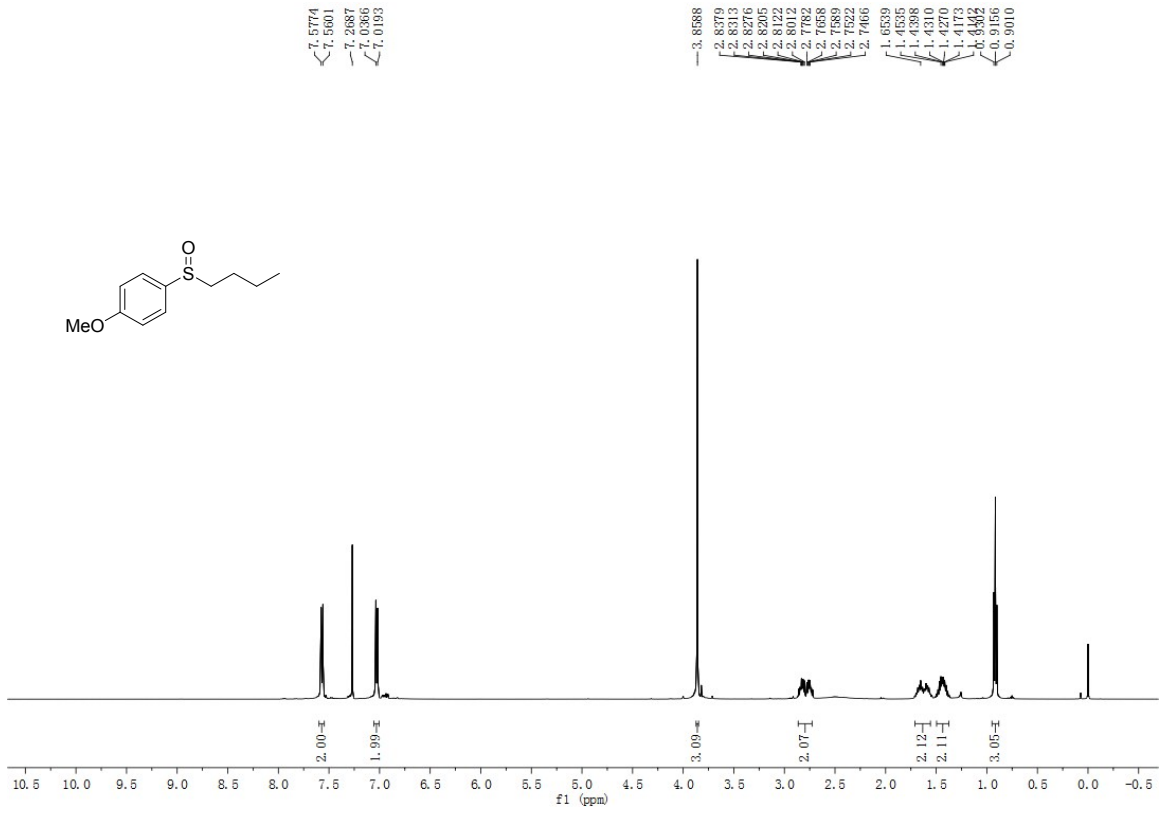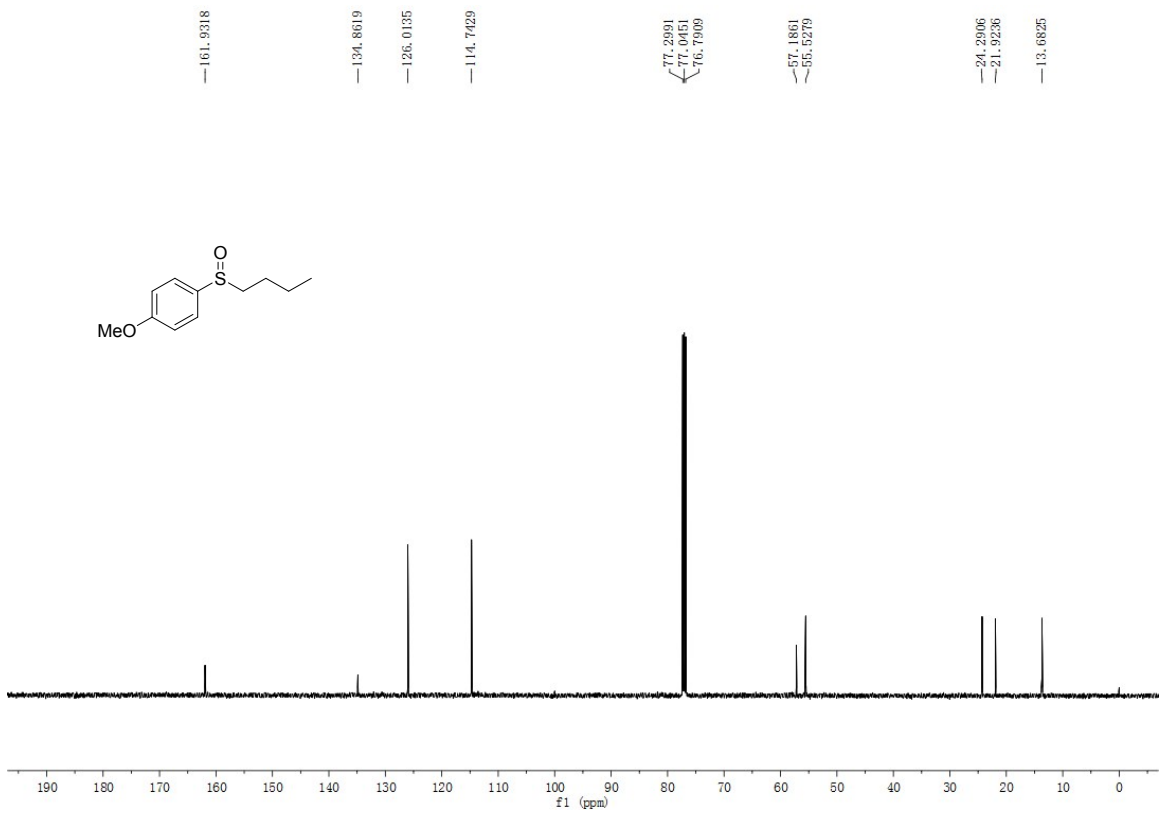

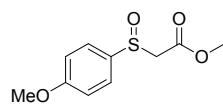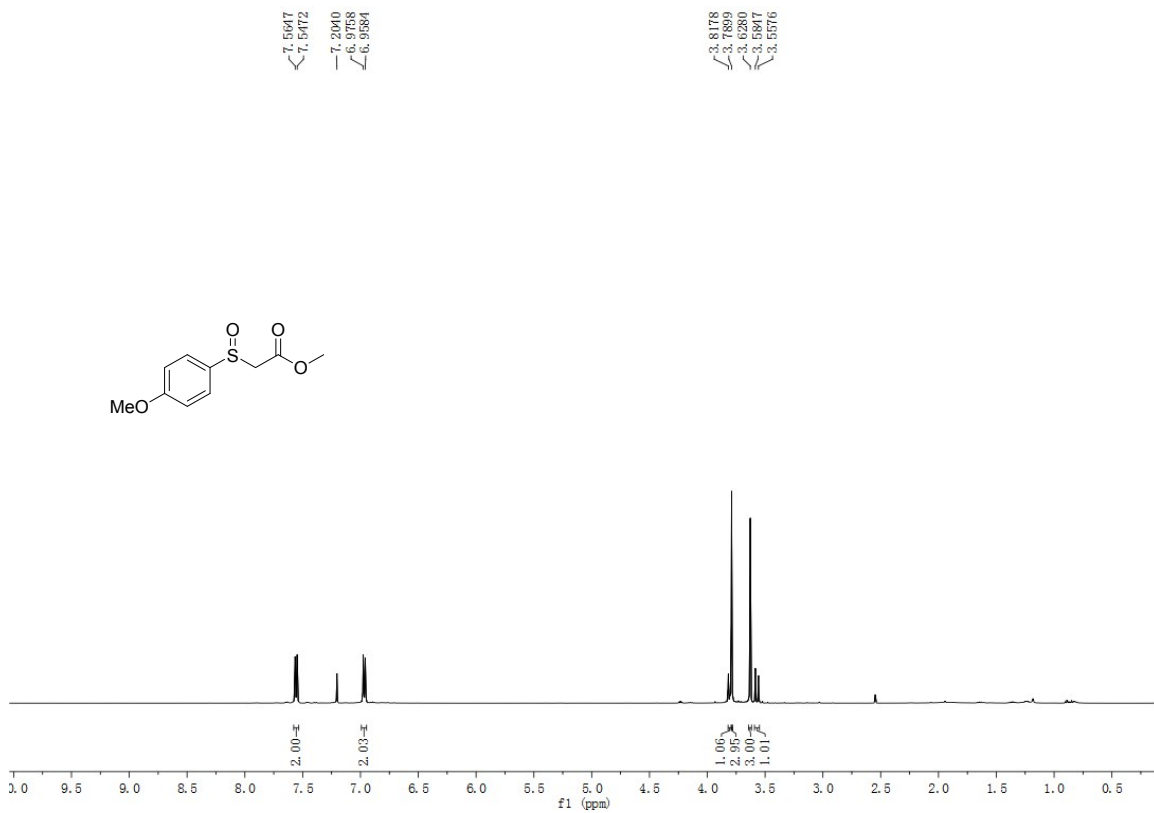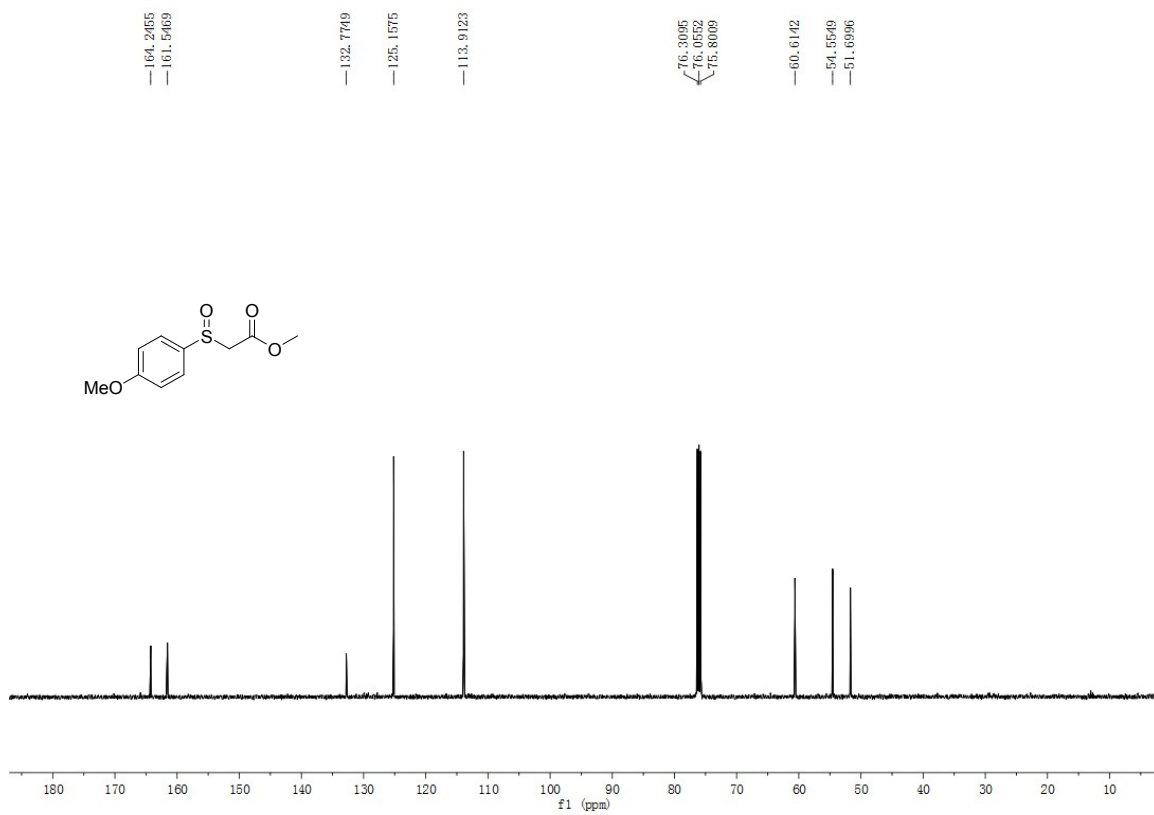

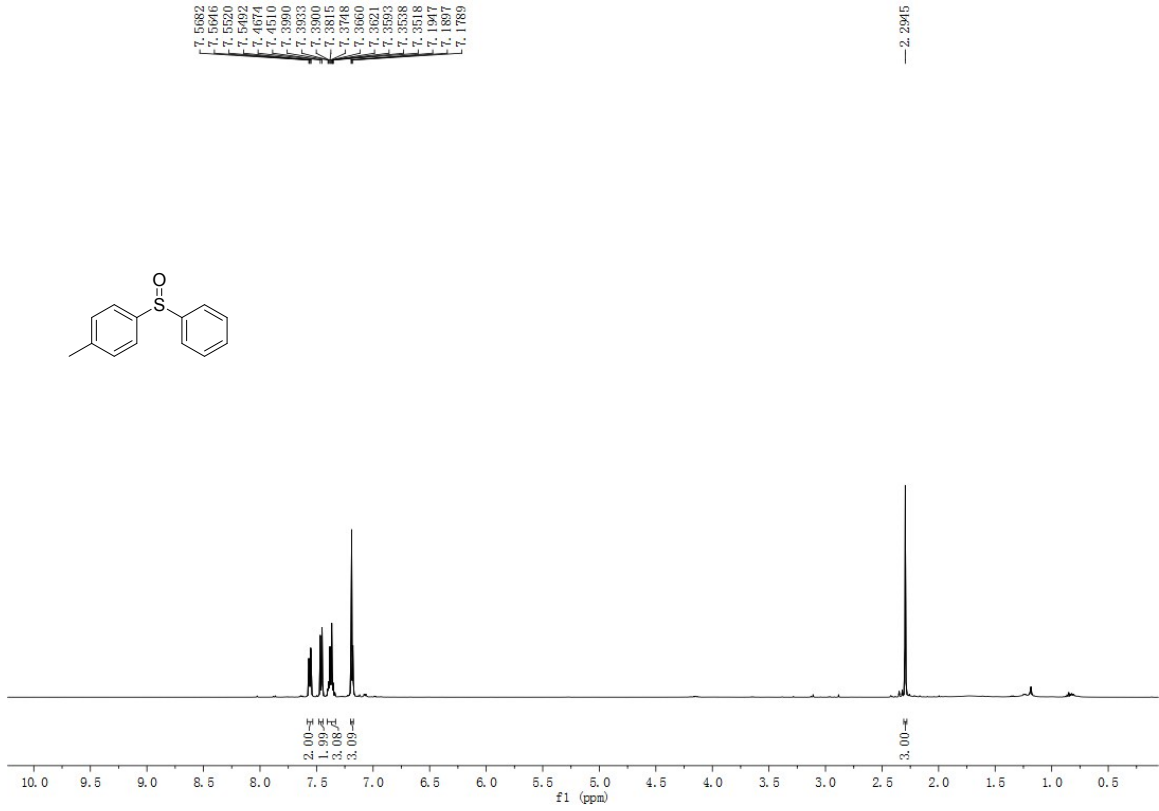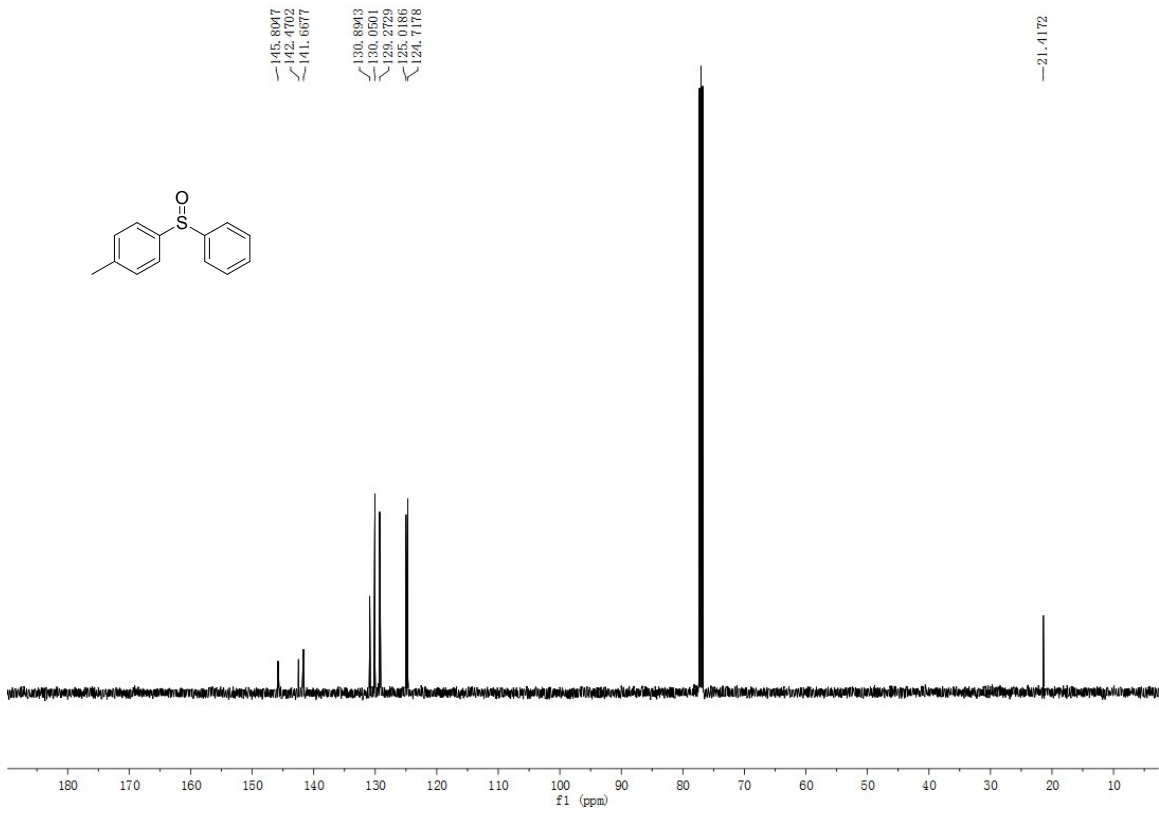

7.6585  
7.6528  
7.6492  
7.6403  
7.6375  
7.4792  
7.4728  
7.4693  
7.4611  
7.4539  
7.4465  
7.4459  
7.4424  
7.4343  
7.4320  
7.4254  
7.4100  
7.3476  
7.3324  
7.3170  
7.3015  
7.2912  
7.2322

-2.3761

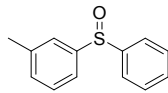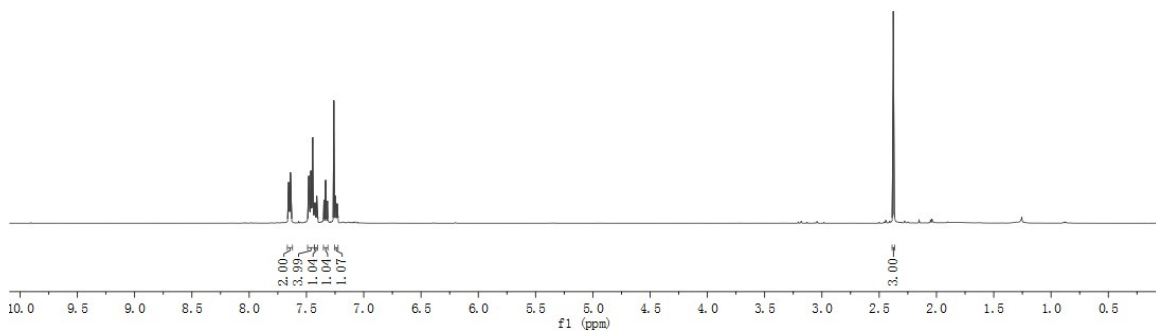

145.6885  
145.3876  
139.5995  
131.0541  
129.9824  
129.3114  
129.1330  
125.0126  
124.7985  
122.0259

77.2997  
77.0458  
76.7916

-21.4437

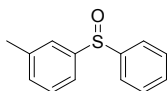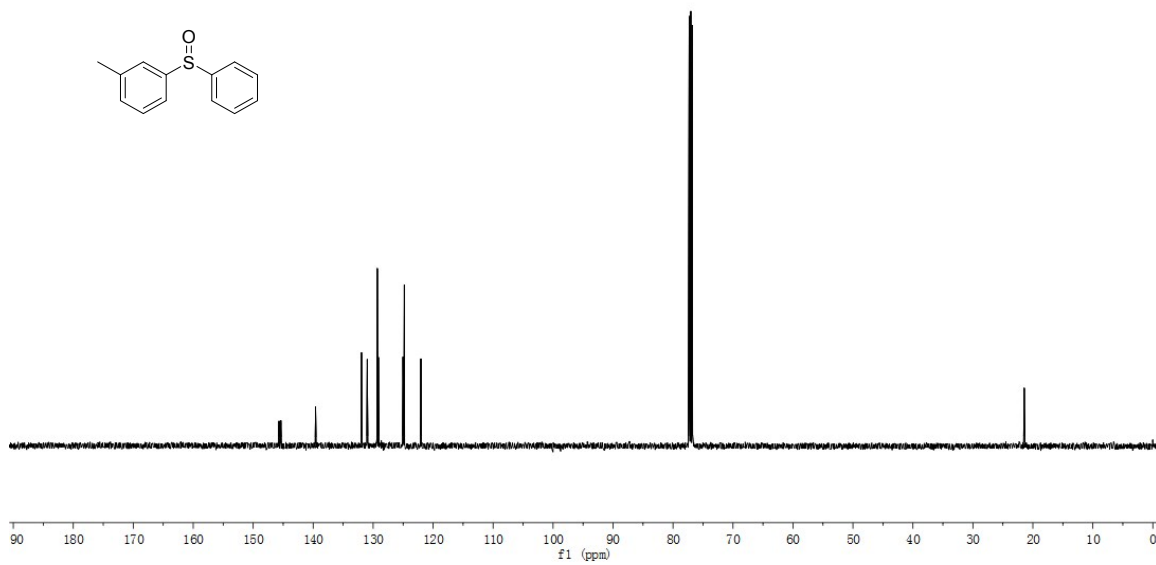



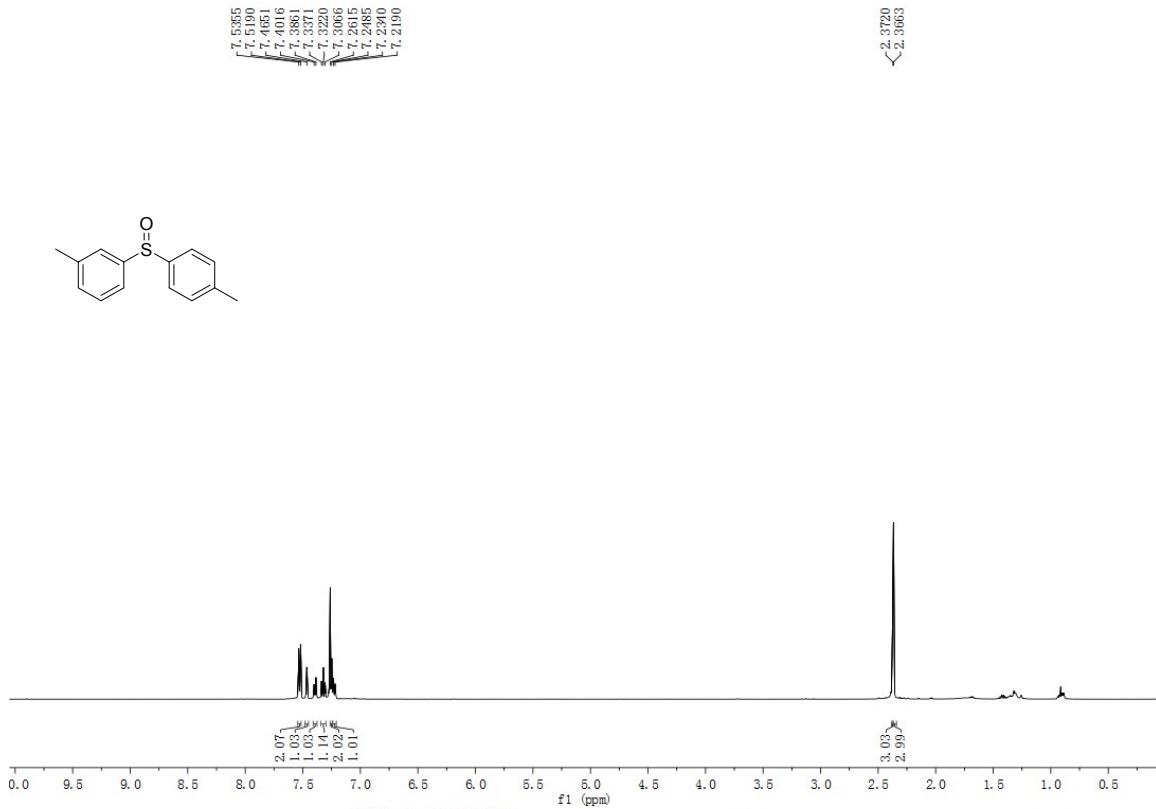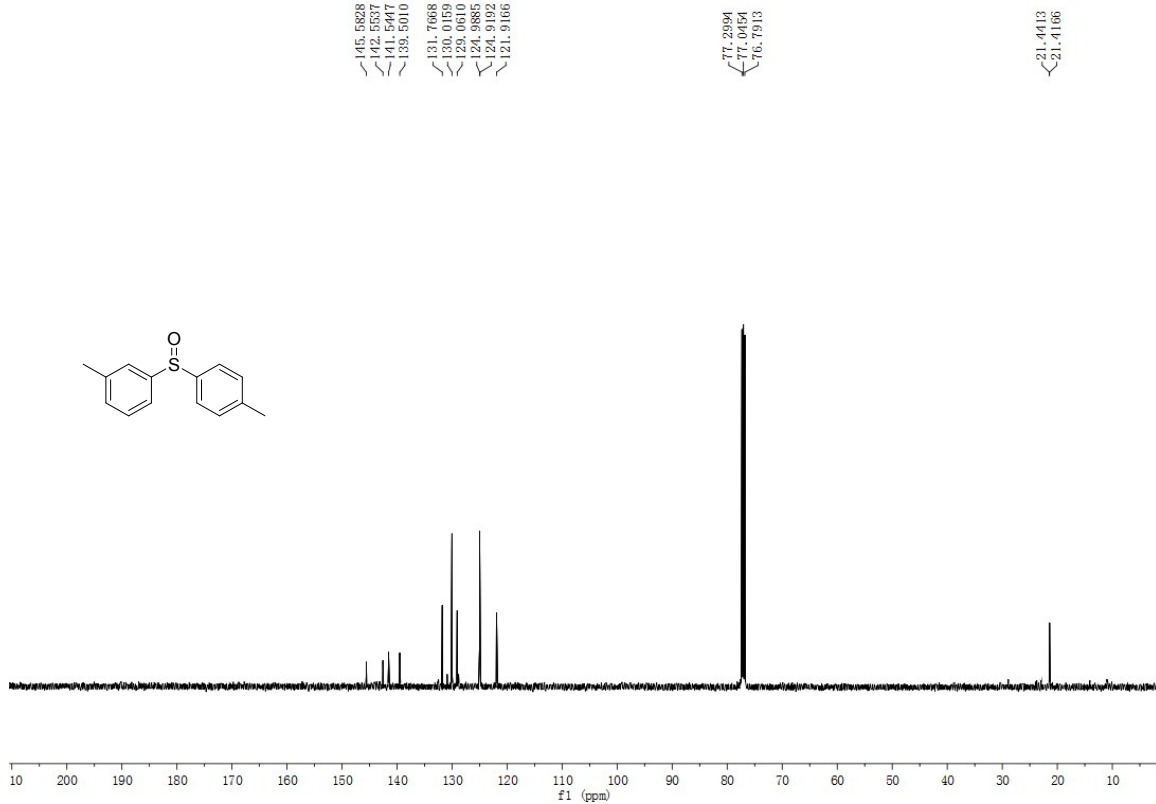

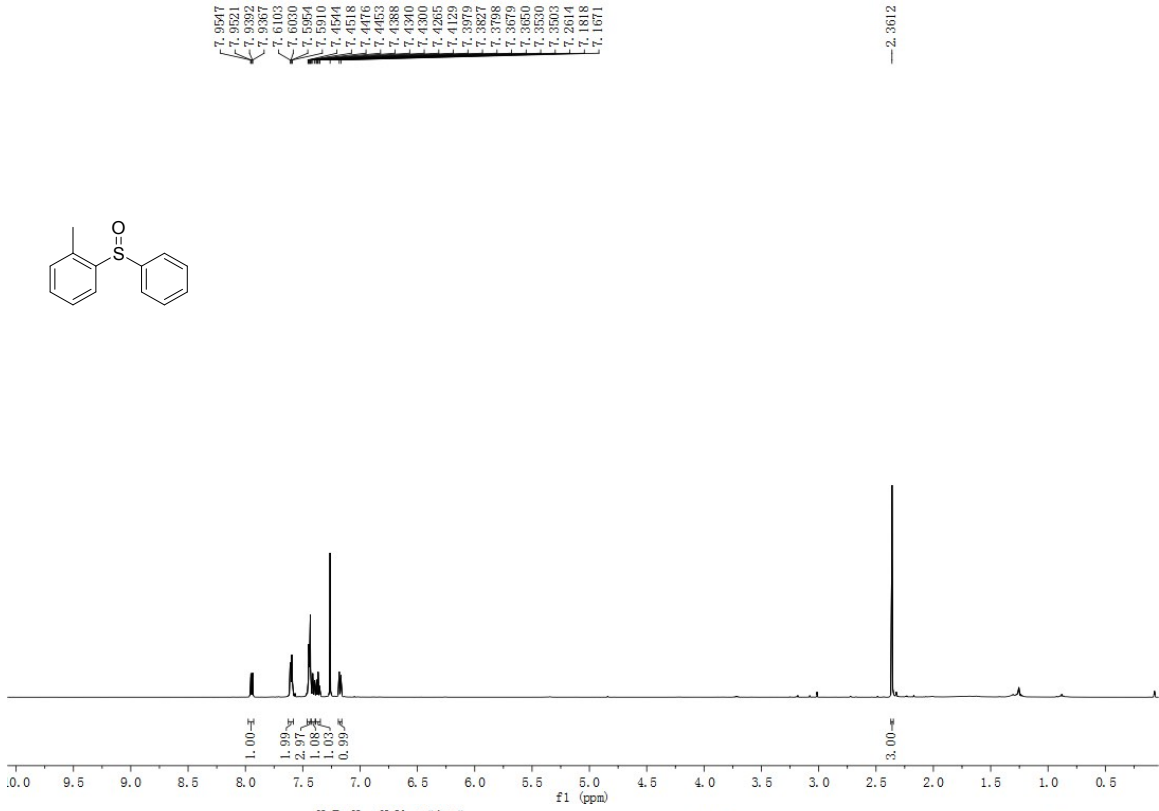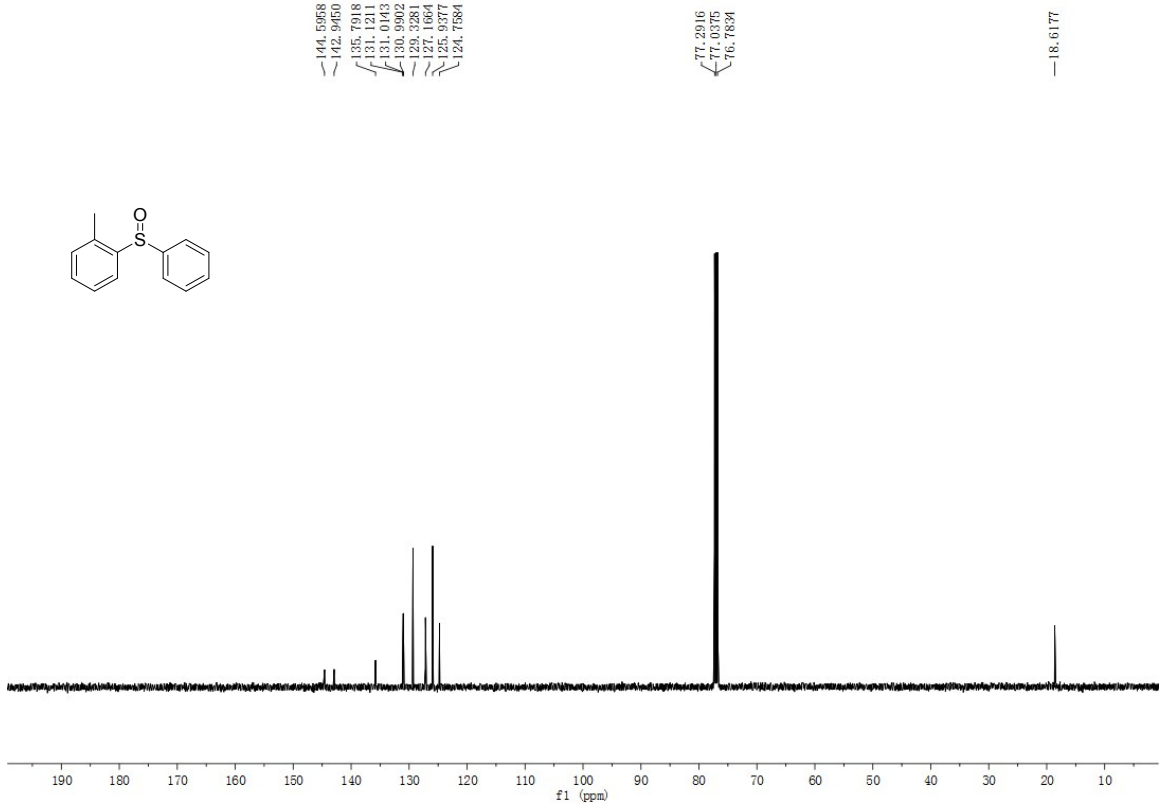

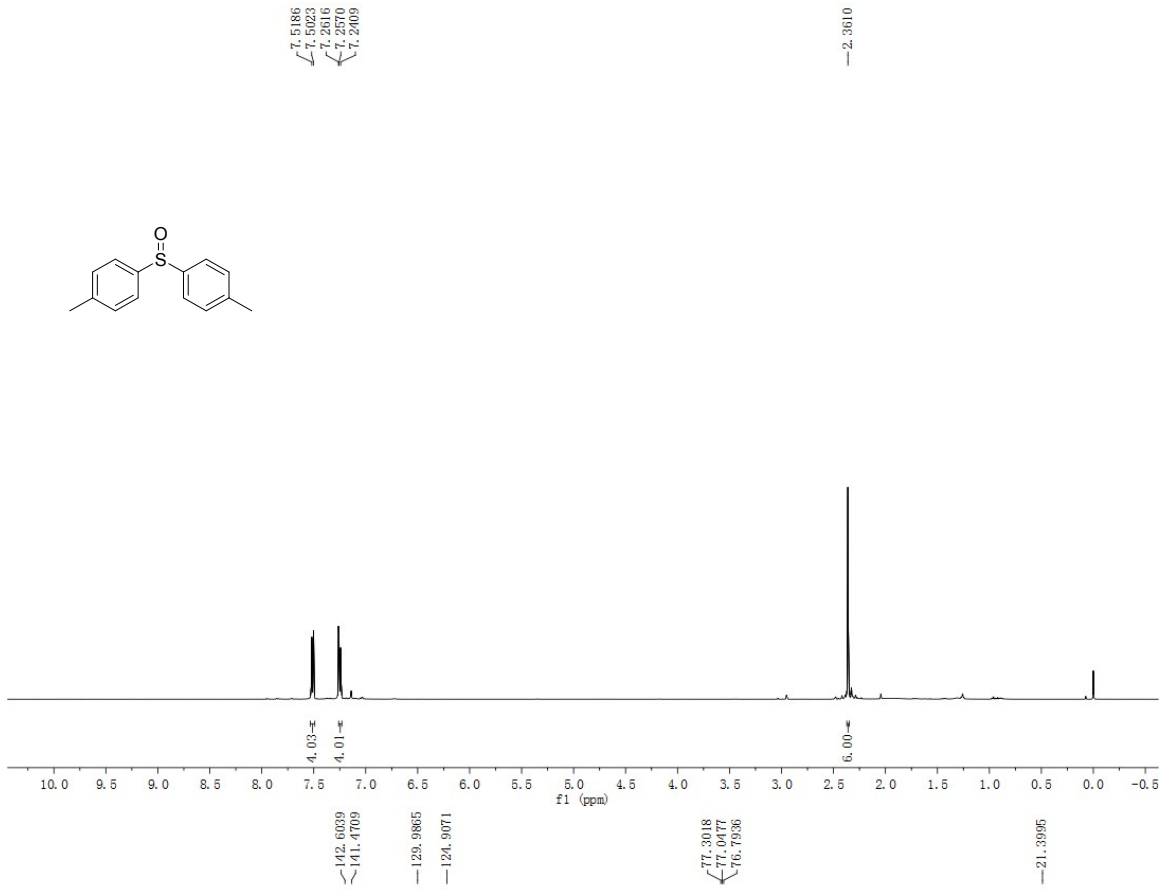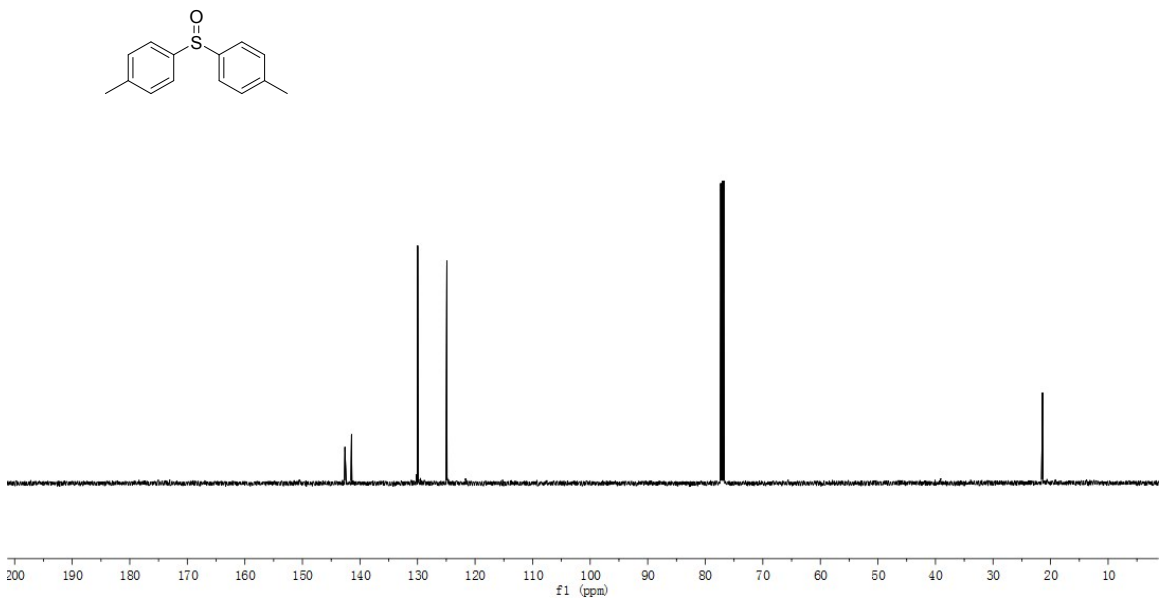

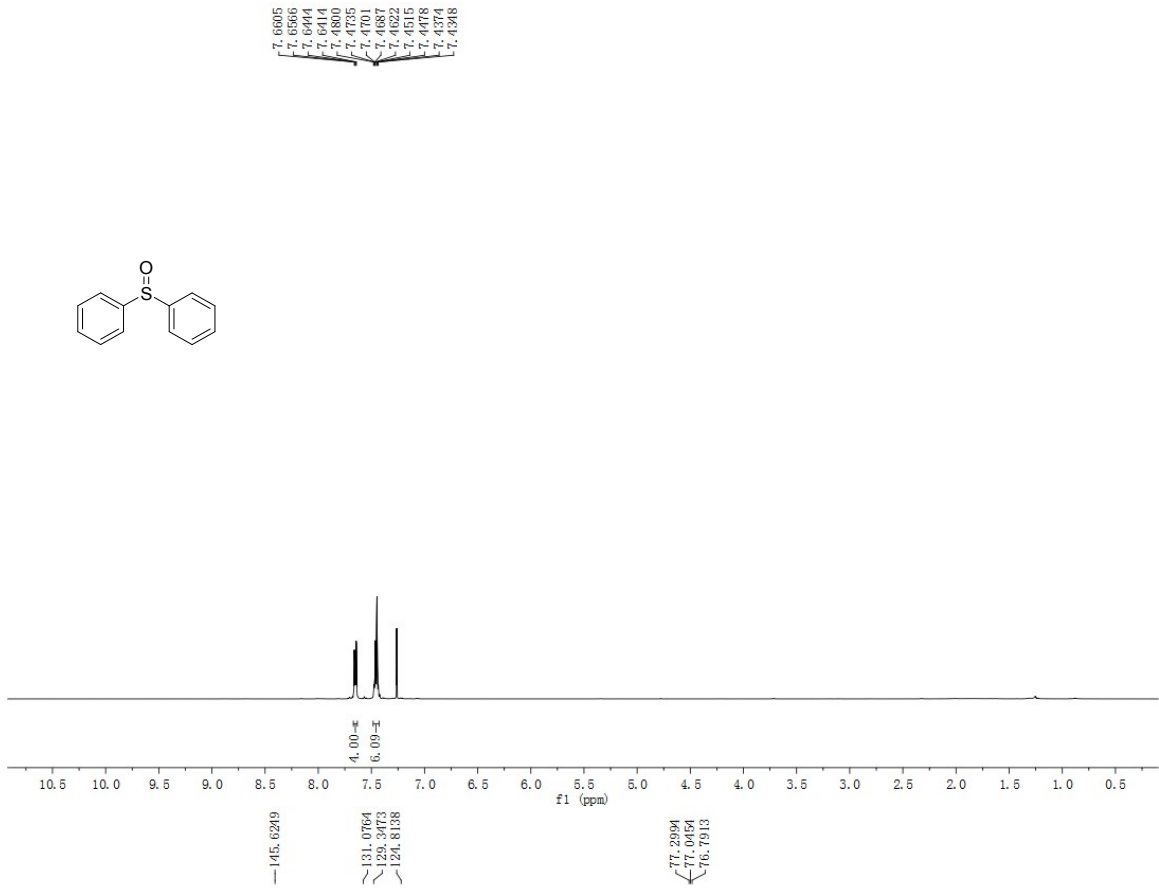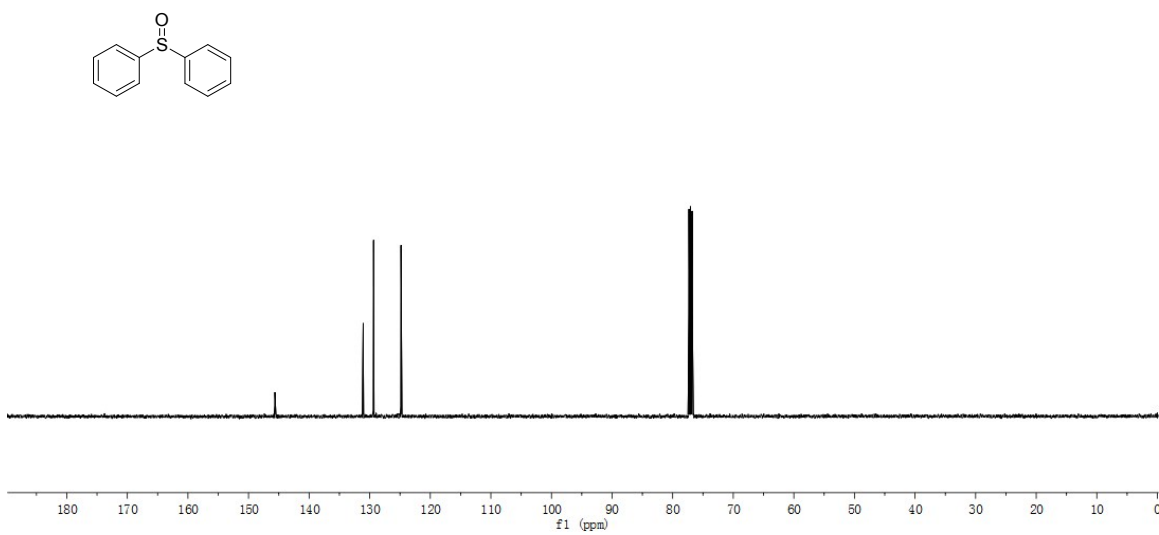

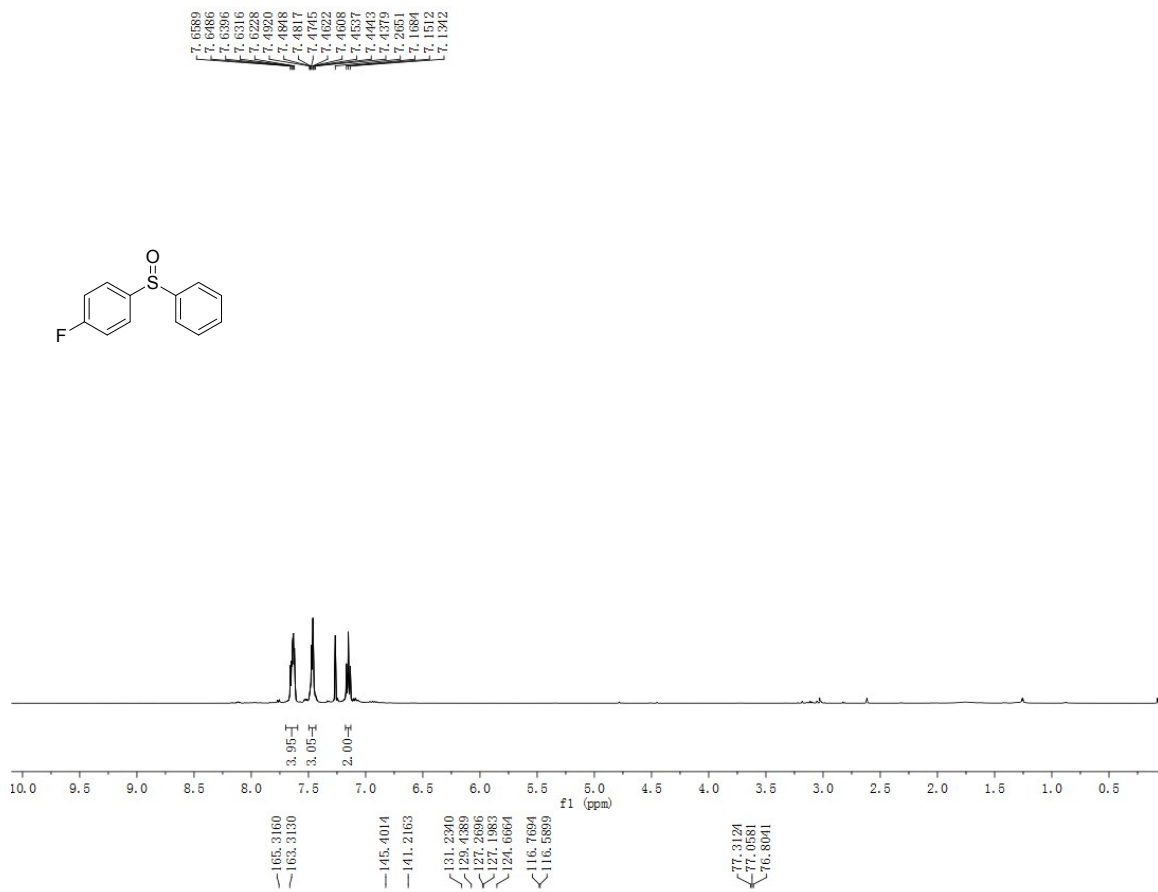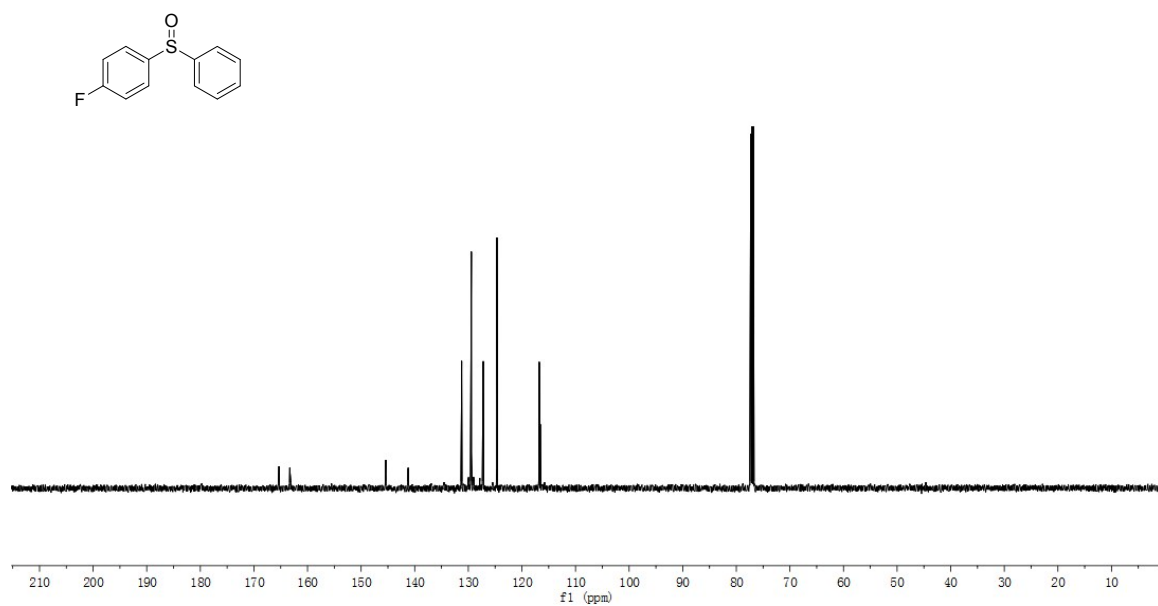

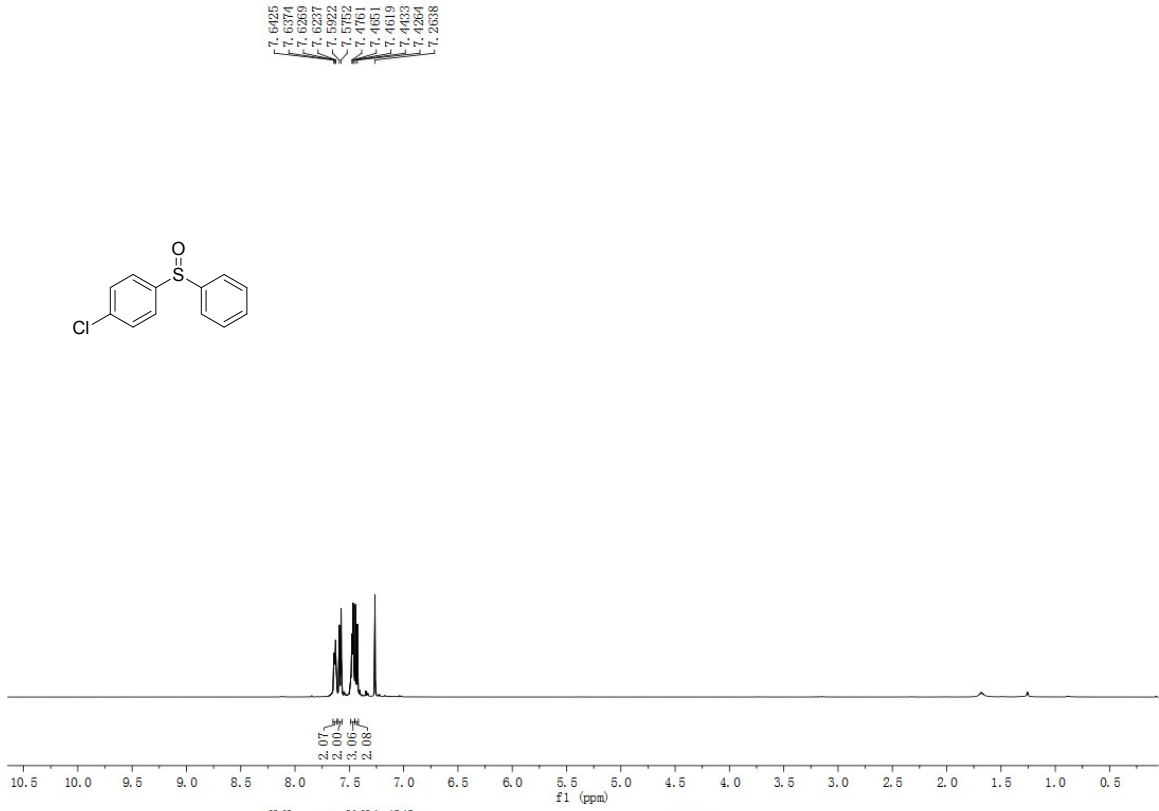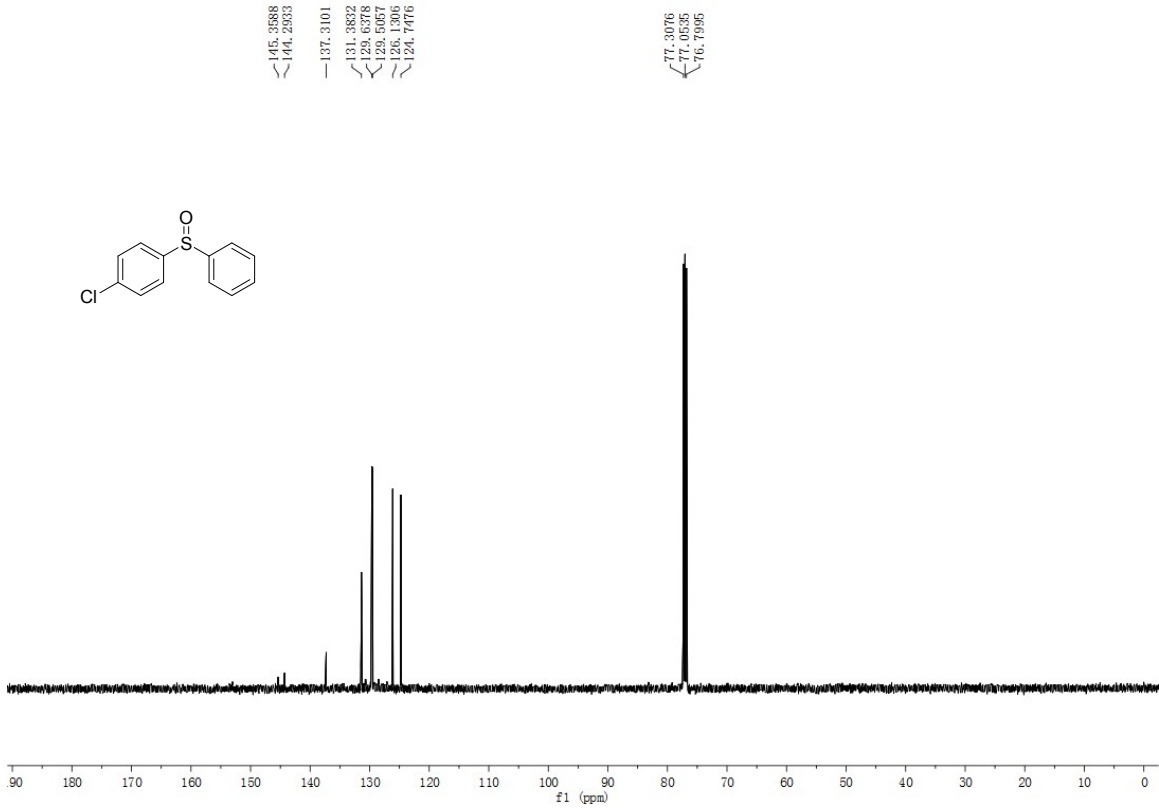

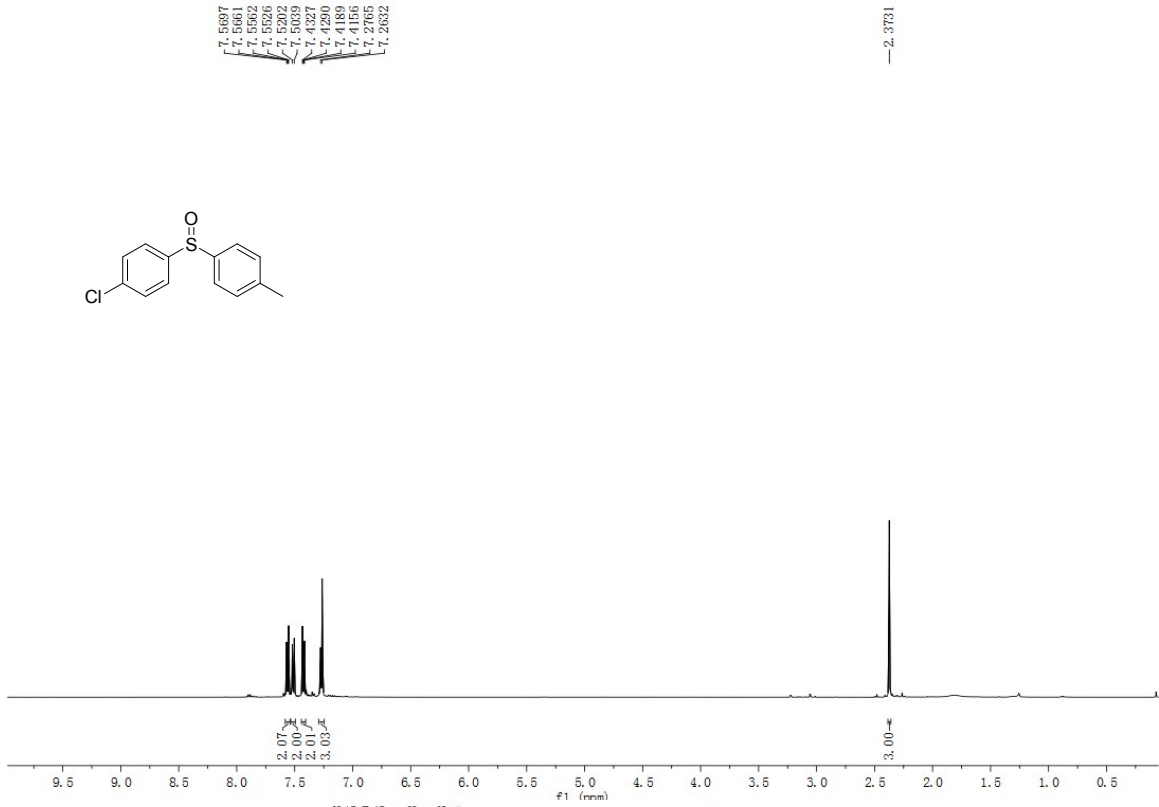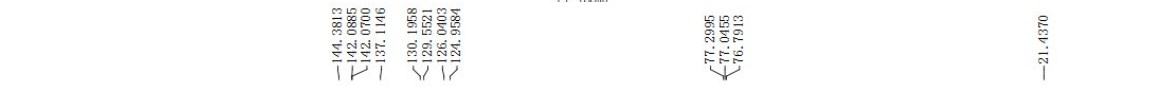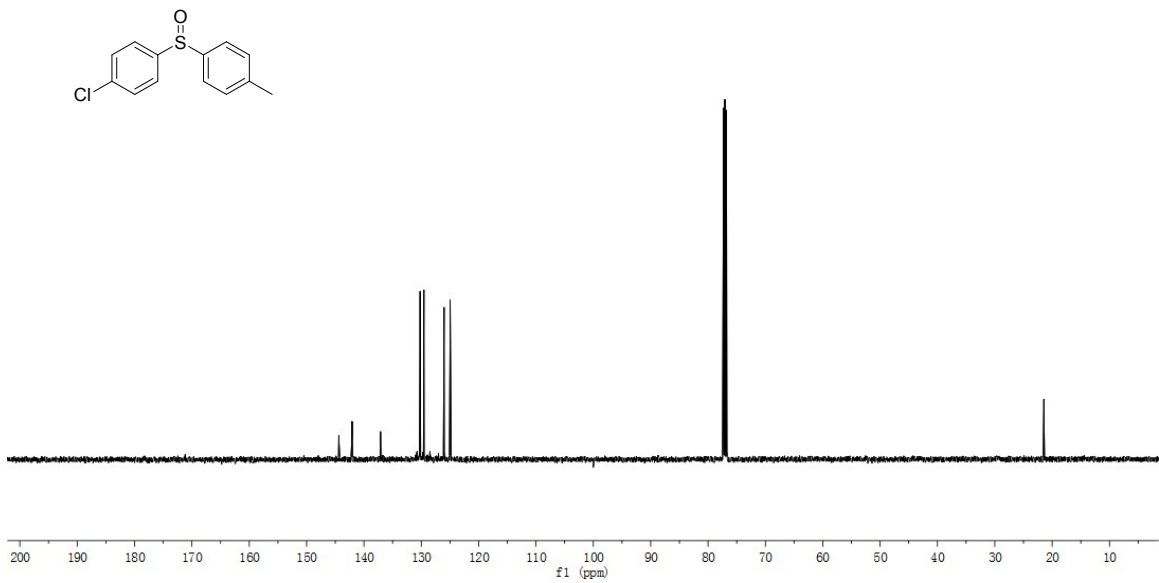

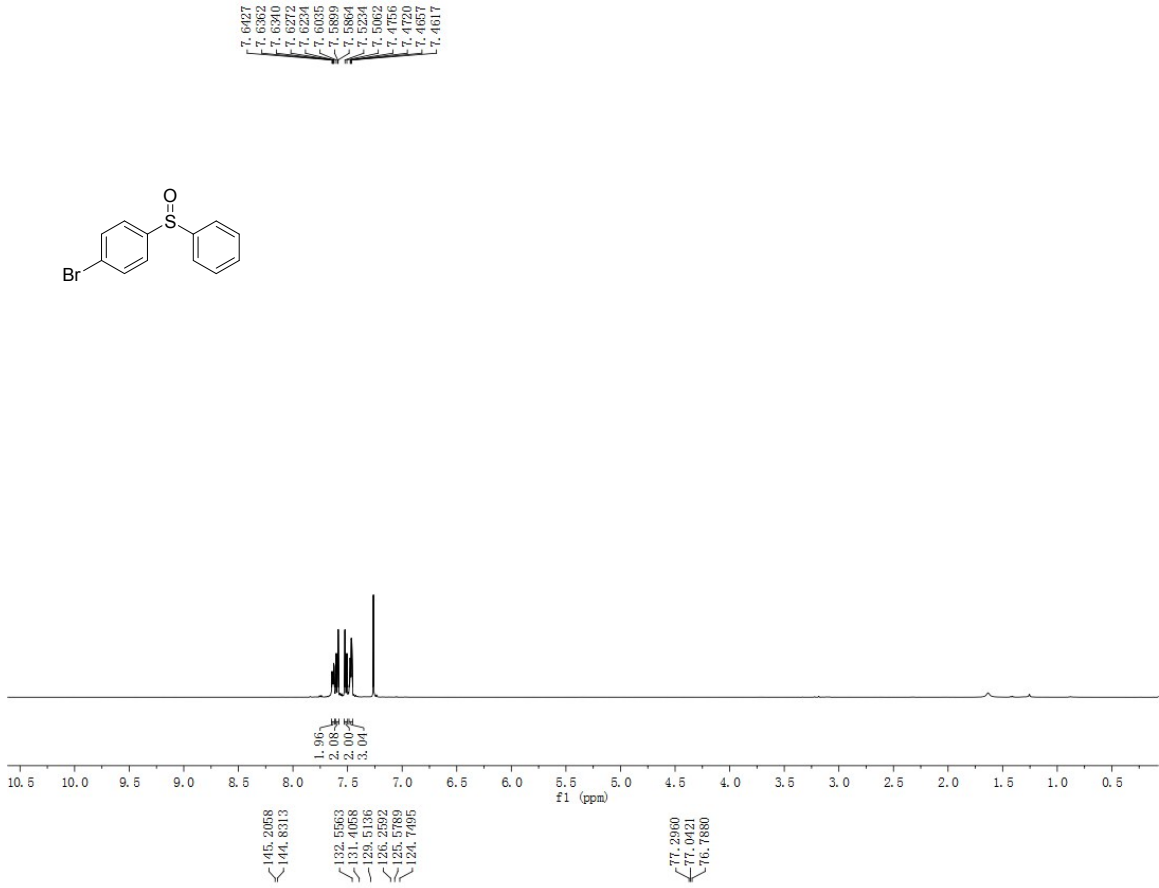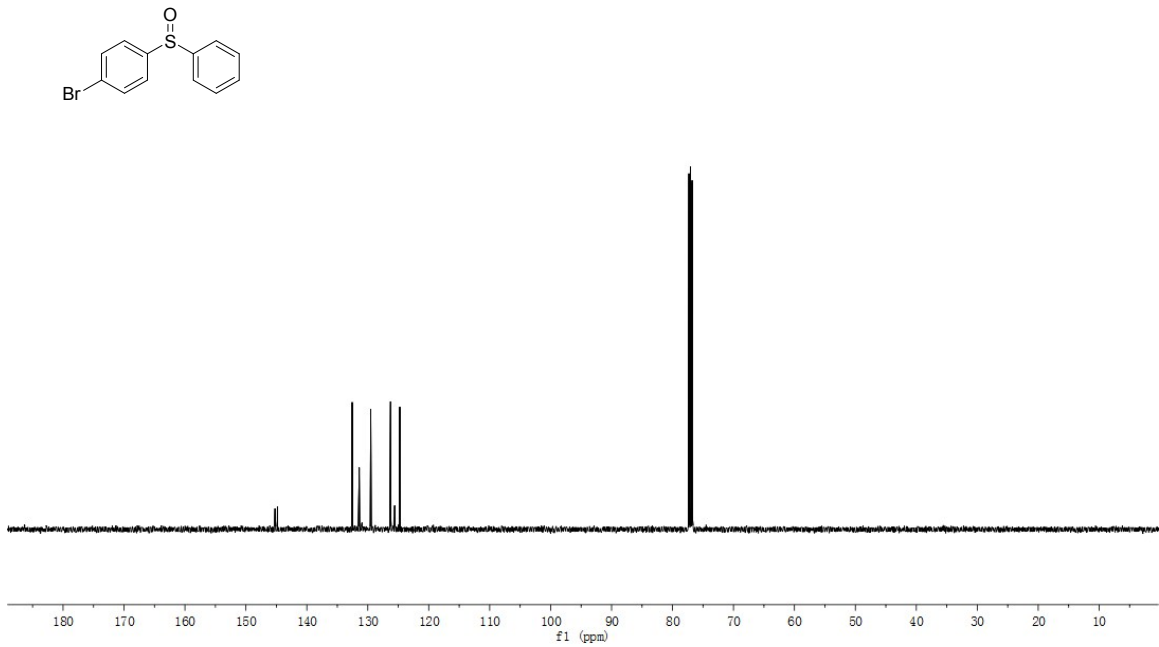



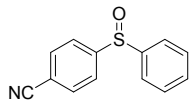

7.7798  
7.7624  
7.7563  
7.7429  
7.7400  
7.7387  
7.6719  
7.6570  
7.6560  
7.6590  
7.6527  
7.6040  
7.4983  
7.4918  
7.4913  
7.2713

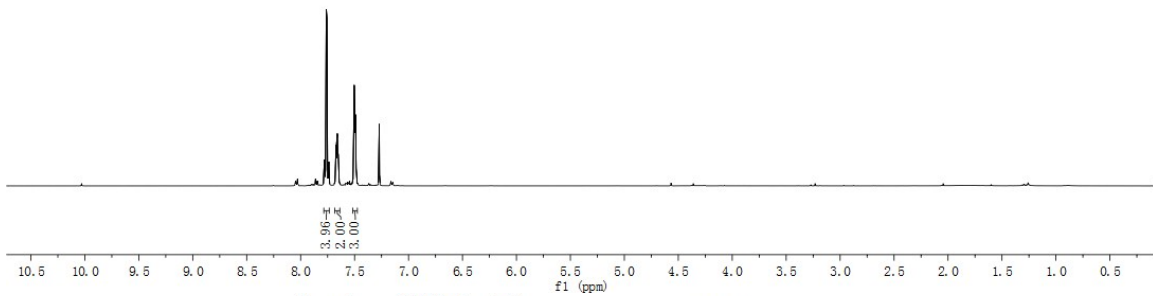

151.1889  
144.4761

132.9890  
131.9888  
129.7972  
125.0317  
124.9234

117.7311  
114.6572

77.3337  
77.0794  
76.8252

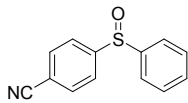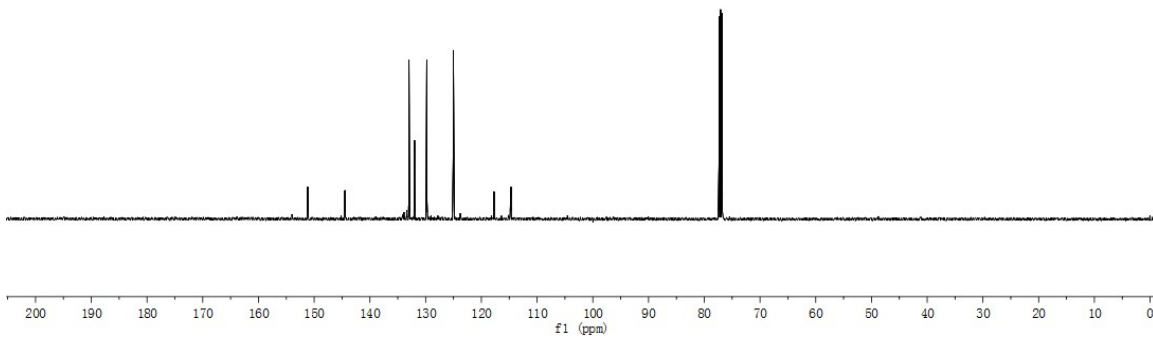

Supplement: c9gc00222g1.pdf [file c9gc00222g1.pdf]
